# Supplementary material
Source: Royal Society of Chemistry journal article supplement (doi:10.1039/d5ta09965j)
Supplement: d5ta09965j1.pdf [file d5ta09965j1.pdf]

## Supporting Information

### **Inter-Site Coupling and Nonlinear Density–Activity Relationship in M–N–C Single-Atom Catalysts**

Xinqi Chen, Ran Shi, Haiyang Cheng, Tianci Huang, Tong Zhou, Qingju Liu, Tianwei He\*

Yunnan Key Laboratory for Micro/Nano Materials & Technology, National Center for International Research on Photoelectric and Energy Materials, School of Materials and Energy, Yunnan University, Kunming 650091, China.

E-mail: [he.tianwei@ynu.edu.cn](mailto:he.tianwei@ynu.edu.cn)

## 1. Calculation Methods Supplement:

### 1.1 Calculation of Single Metal Atom Energy $E_M$ :

$$E_M = E_{M(bulk)}/N \# \quad (1)$$

$E_{M(bulk)}$  represents the energy of a single metal atom in the metal solid, N represents the number of atoms in the metal solid.

### 1.2 Calculation of Gibbs Free Energy

#### 1.2.1 Hydrogen Evolution Reaction (HER)

To evaluate the performance of the HER, the Gibbs free energy of H adsorption ( $\Delta G_{*H}$ ) is calculated under standard conditions ( $U = 0$  V,  $pH = 0$ ).<sup>1</sup>

$$\Delta G_{*H} = \Delta E_{*H} + \Delta E_{ZPE} + T\Delta S + \Delta G_U + \Delta G_{pH} \# \# \quad (2)$$

$$\Delta G_U = -eU \# \quad (3)$$

$$\Delta G_{pH} = -kT \ln_{10} * pH \# \quad (4)$$

$\Delta E_{*H}$  corresponds to the overall energy difference associated with the stable adsorption of a hydrogen atom H.  $\Delta E_{ZPE}$  denotes the change in zero-point energy (ZPE) of hydrogen between its gaseous and adsorbed states. T is set to 298.15 K, and  $\Delta S$  represents the change in entropy. U indicates the electrode potential relative to the standard hydrogen electrode, while e is the number of electrons transferred in each reaction step.  $\Delta G_U$  refers to the voltage-dependent contribution to the Gibbs free energy, and  $\Delta G_{pH}$  is the correction term that accounts for the influence of pH.

$$\Delta E_{*H} = E_{*H} - E_* - 1/2 E_{H_2} \# \quad (5)$$

$E_{slab}$  and  $E_{*H}$  correspond to the energy of the substrate prior to and following hydrogen adsorption, respectively,  $E_{H_2}$  denotes the total energy of a hydrogen molecule in the gas phase.

$1/2 E_{H_2}$  provides an approximate representation of the energy associated with a single H atom.

$$\eta^{HER} \propto \Delta E_{*H} \# \quad (6)$$

$\eta^{HER}$  represents the overpotential of the HER.

#### 1.2.2 Oxygen Evolution Reaction (OER)

To assess the OER performance, the mechanism is described via a four-step reaction pathway.

1: A water molecule dissociates, releasing a proton pair ( $H^+ + e^-$ ), resulting in the adsorption of

OH as the \*OH intermediate; 2: The \*OH releases a proton pair ( $H^{++} e^-$ ), forming the intermediate \*O. 3: a second water molecule reacts with \*O, generating the \*OOH intermediate. 4: \*OOH releases a proton pair ( $H^{++} e^-$ ) to produce molecular oxygen ( $O_2$ ), thereby regenerating the active site of the catalyst for the next OER cycle.<sup>2</sup>

The adsorption energies of the intermediates are calculated using the following formula:

$$\Delta E_{*OH} = E_{*OH} - E_* - E_{H_2O} + \frac{1}{2}E_{H_2} \quad \# (7)$$

$$\Delta E_{*O} = E_{*O} - E_* - E_{H_2O} + E_{H_2} \quad \# (8)$$

$$\Delta E_{*OOH} = E_{*OOH} - E_* - 2E_{H_2O} + \frac{3}{2}E_{H_2} \quad \# (9)$$

The Gibbs free energies of adsorption for the three intermediates (\*OH, \*O, and \*OOH) are

denoted by  $E_{*OH}$ ,  $E_{*O}$  and  $\Delta E_{*OOH}$ , respectively. The total energies of \*OH, \*O, and \*OOH adsorbed on the catalyst are represented by  $\Delta E_{*OH}$ ,  $\Delta E_{*O}$  and  $\Delta E_{*OOH}$ . While the Gibbs free energies of the bare catalyst,  $H_2O$ , and  $H_2$  are given by  $E_*$ ,  $E_{H_2O}$  and  $E_{H_2}$ , respectively.

The change in Gibbs free energy for each step of the oxygen evolution reaction is computed according to the equations below:

$$\Delta G_1 = \Delta E_{*OH} \quad \# (10)$$

$$\Delta G_2 = \Delta E_{*O} - \Delta E_{*OH} \quad \# (11)$$

$$\Delta G_3 = \Delta E_{*OOH} - \Delta E_{*O} \quad \# (12)$$

$$\Delta G_4 = 4.92 - \Delta E_{*OOH} \quad \# (13)$$

$\Delta G_1$ ,  $\Delta G_2$ ,  $\Delta G_3$  and  $\Delta G_4$  represent the Gibbs free energy changes for each step of the OER process, respectively.

To more intuitively compare the OER performance among different single-atom catalysts, the overpotential of the OER,  $\eta^{OER}$  is determined by identifying the potential-determining step (PDS), which corresponds to the step exhibiting the highest energy increase throughout the

reaction, and is calculated using the following expression:

$$\eta^{OER} = \max\{\Delta G_1, \Delta G_2, \Delta G_3, \Delta G_4\}/e - 1.23 \text{ (V)} \# (14)$$

### 1.3 Calculation of Crystal Orbital Hamilton Population (COHP):

The COHP analysis is carried out with the LOBSTER code,<sup>3</sup> which differentiates bonding from antibonding interactions between atoms based on electron density; the integrated COHP (ICOHP) provides a quantitative measure of bond strength, where increasingly negative ICOHP values correspond to greater bonding strength.

### 1.4 Loading of single-atom catalysts (SACs)

Weight percentage (wt%):

$$wt\% = n_M * \frac{M_M}{n_M * M_M + n_N * M_N + n_C * M_C} \#(15)$$

Atomic percentage (at%):

$$at\% = \frac{n_M}{n_M + n_N + n_C} \#(16)$$

Where  $n_M$ ,  $n_N$ ,  $n_C$  represent the numbers of metal atoms, N atoms, and C atoms in the SACs, respectively;  $M_M$ ,  $M_N$ ,  $M_C$  denote the relative atomic masses of the metal atom, N atom, and C atom, respectively.

## 2.Supplementary Figures:

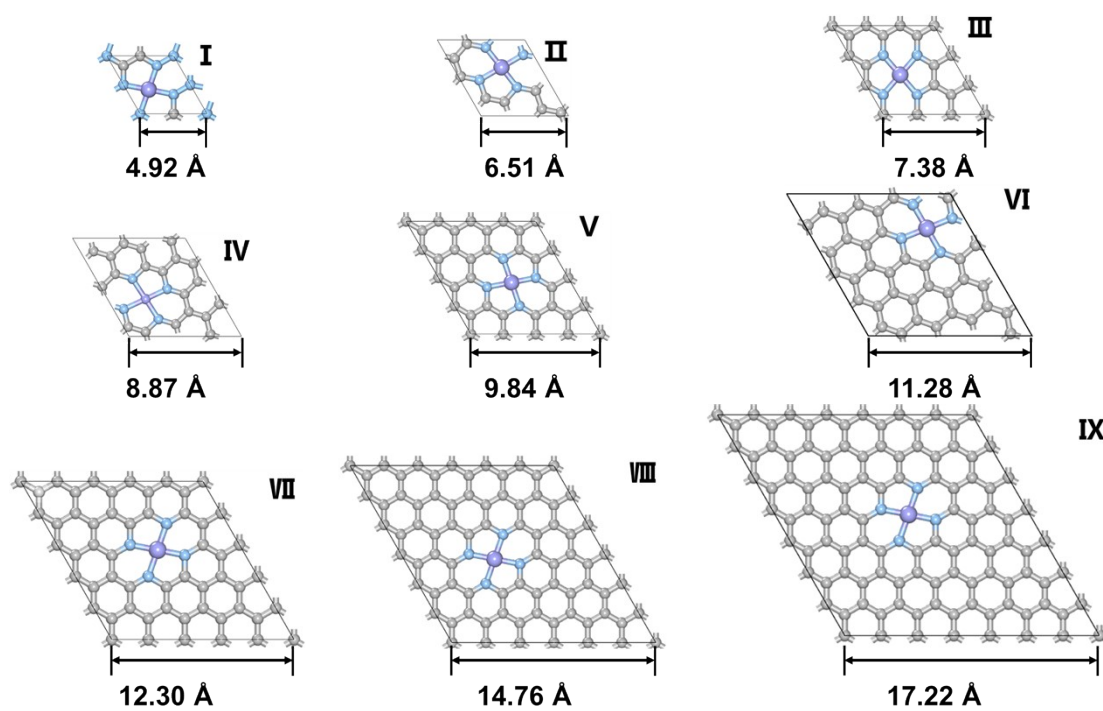

**Figure S1.** Unit cells of nine distinct MN<sub>4</sub>-X structures with varying lattice sizes (X = I, II, III, IV, V, VI, VII, VIII, IX) used for DFT calculations.

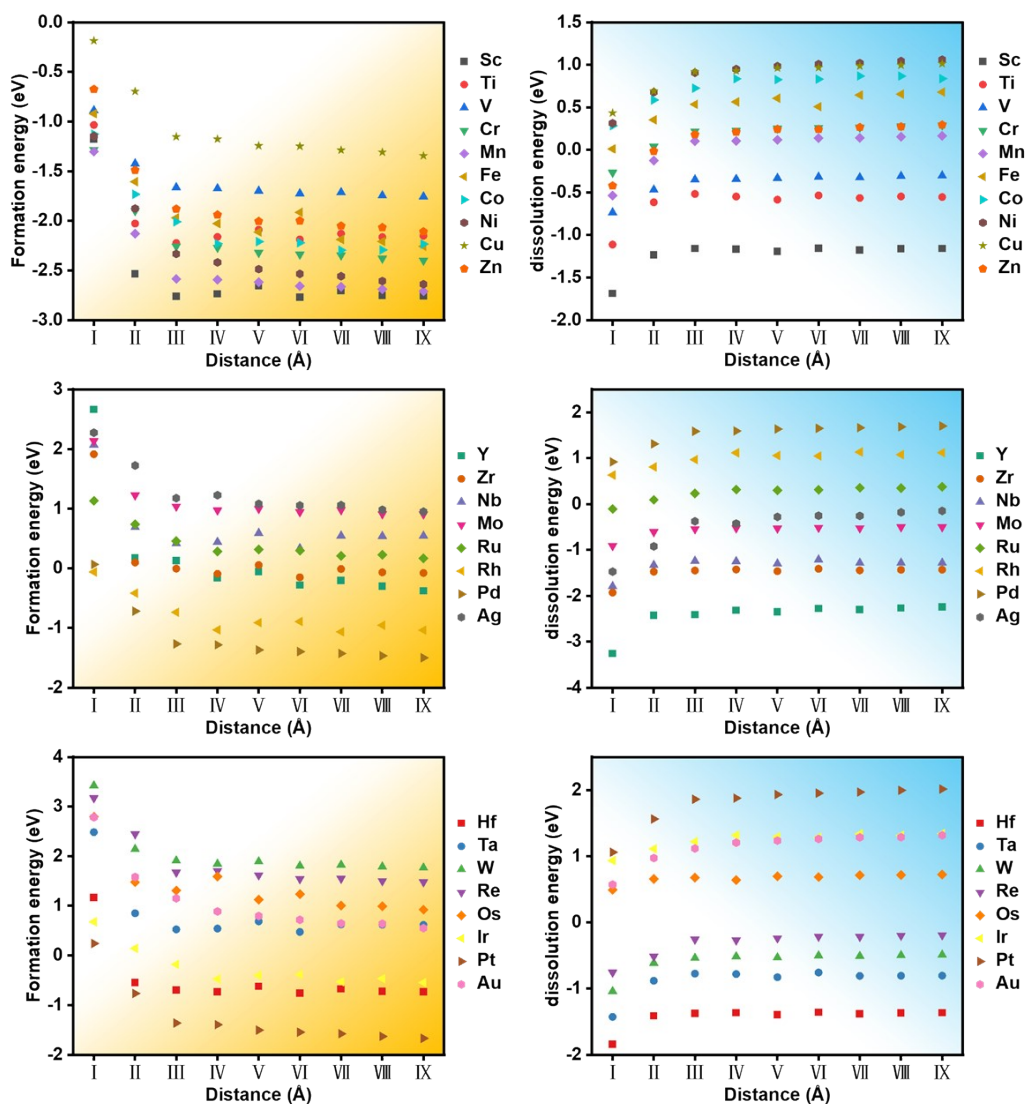

**Figure S2.** Formation energy and dissolution energy of 3d, 4d, and 5d metal atoms supported on different  $MN_4-X$  substrates.

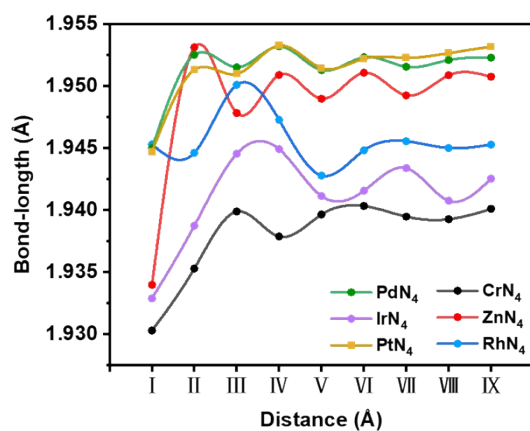

**Figure S3.** Variation of M–N bond length as a function of inter-metal-site distance for  $MN_4-X$  ( $X = Cr, Zn, Rh, Pd, Ir, Pt$ ).

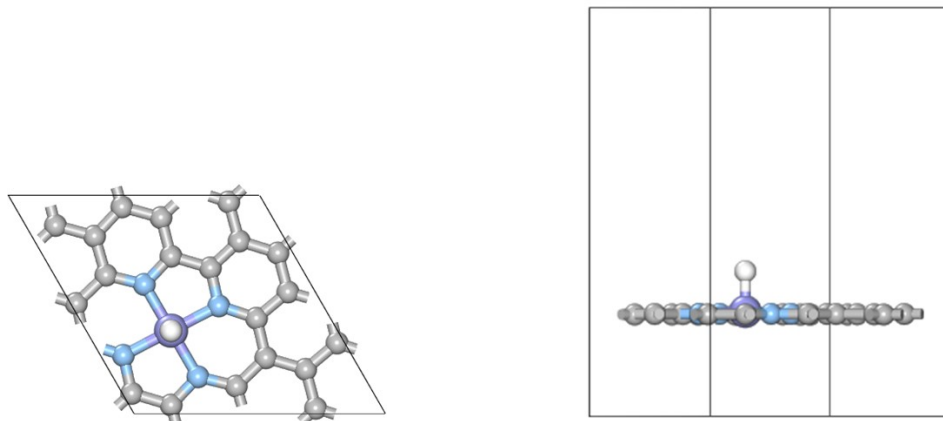

**Figure S4.** Stable adsorption configuration of H on  $MN_4$ -X structures (top view and side view).

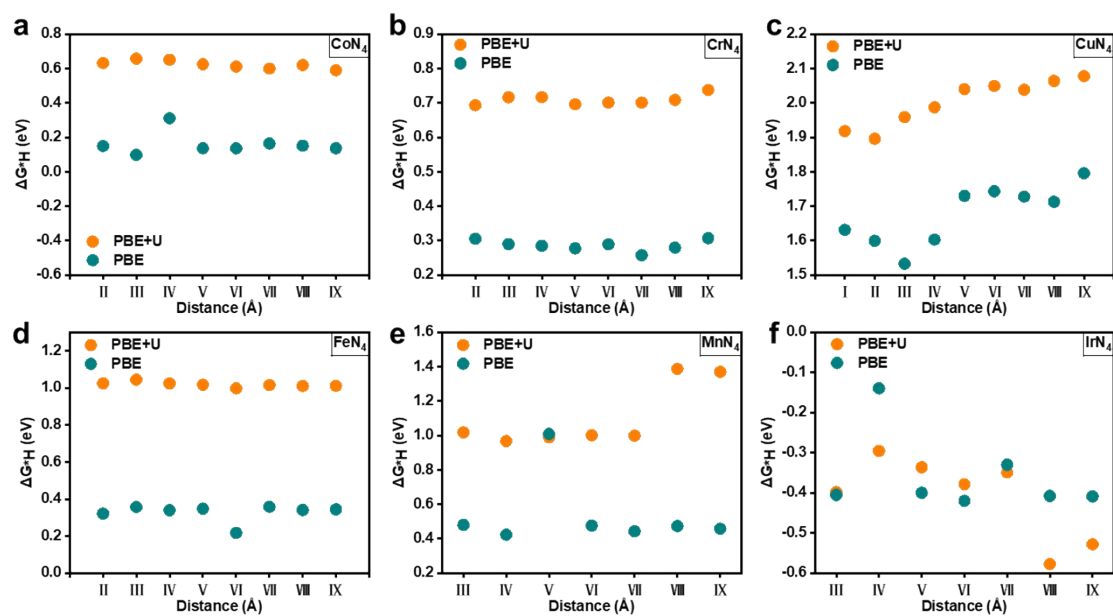

**Figure S5.** Comparison of HER free energy diagrams for  $MN_4$ -X ( $X = Co, Cr, Cu, Fe, Mn, Ir$ ) structures calculated using the PBE and PBE+U methods.

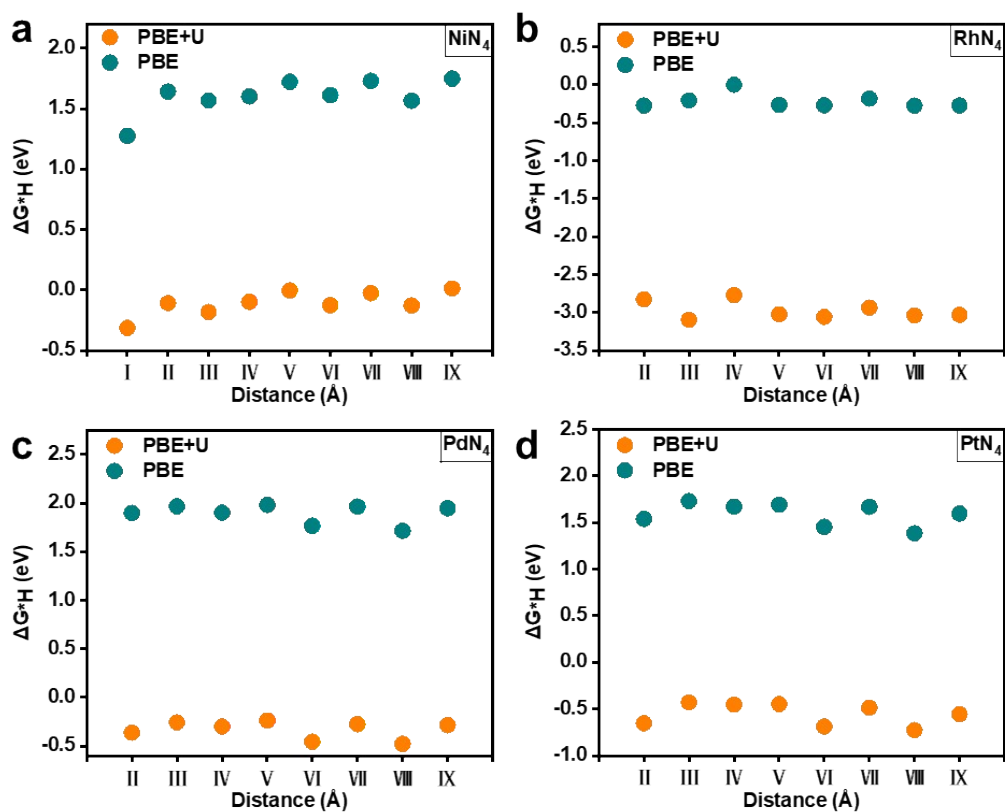

**Figure S6.** Comparison of HER free energy diagrams for  $MN_4-X$  ( $X = Ni, Rh, Pd, Pt$ ) structures calculated using the PBE and PBE+U methods.

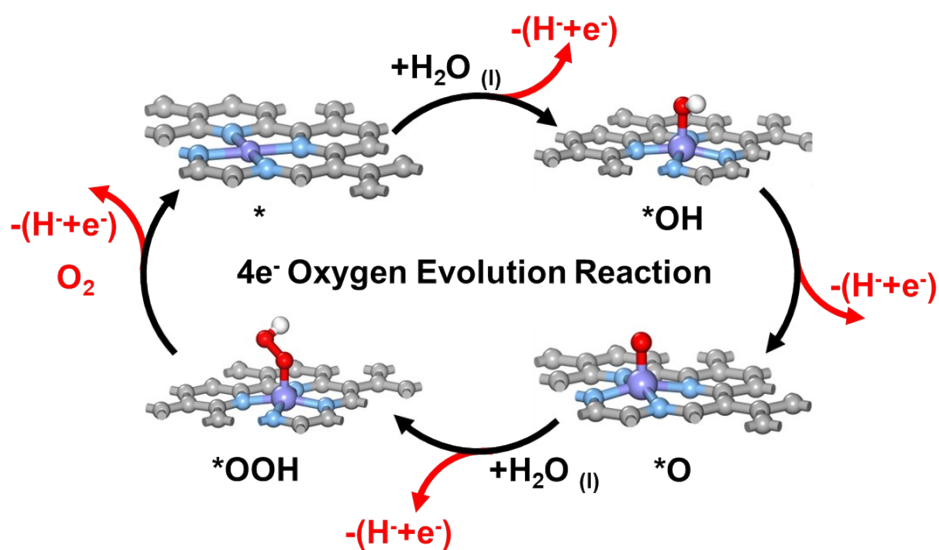

**Figure S7.** Reaction pathway of the  $4e^-$  oxygen evolution reaction.

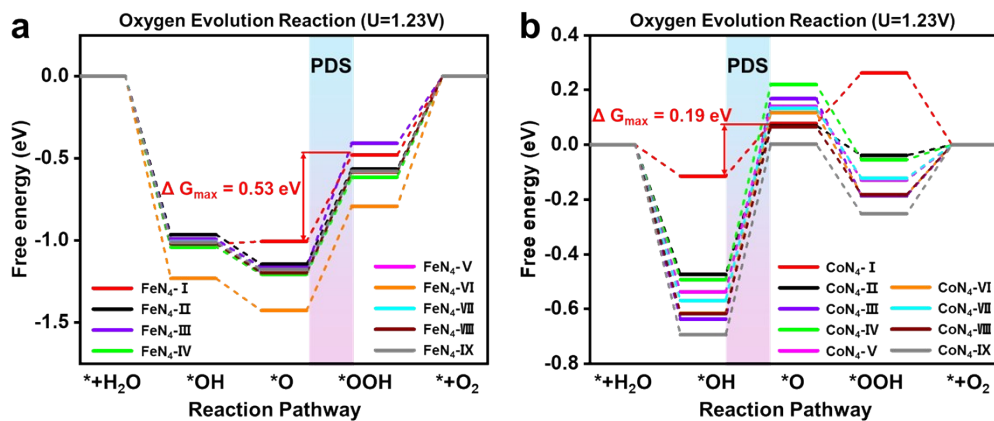

**Figure S8.** OER free energy diagrams of a)  $\text{FeN}_4\text{-X}$  and b)  $\text{CoN}_4\text{-X}$  structures calculated using the PBE method.

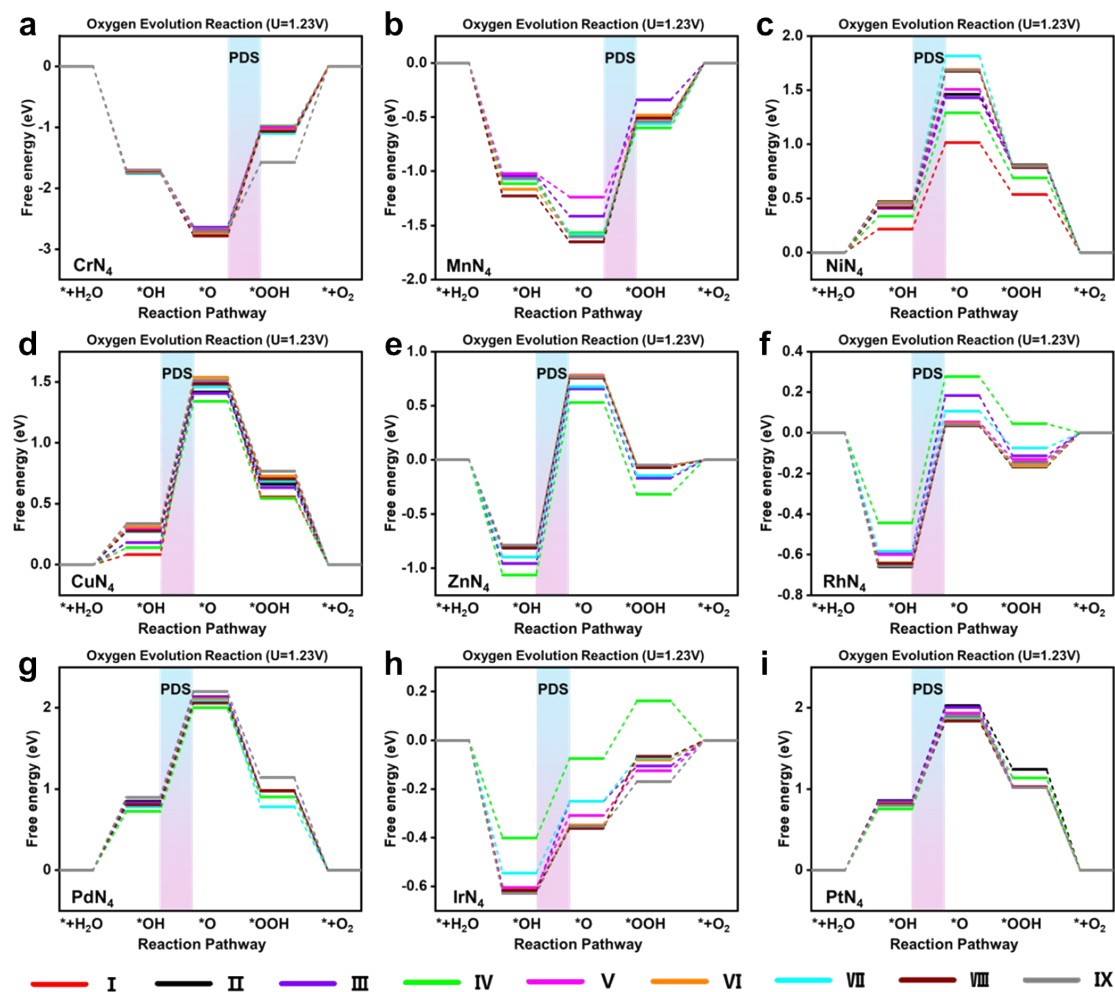

**Figure S9.** OER free energy diagrams of  $\text{MN}_4\text{-X}$  ( $\text{X} = \text{Cr}, \text{Mn}, \text{Ni}, \text{Cu}, \text{Zn}, \text{Rh}, \text{Pd}, \text{Ir}, \text{Pt}$ ) structures calculated using the PBE method.

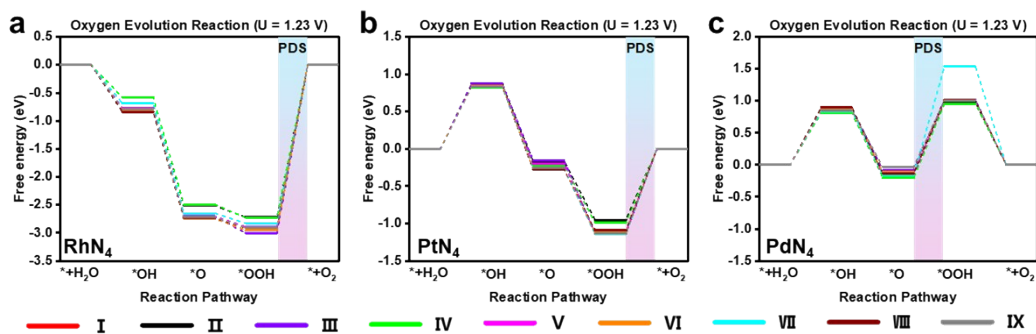

**Figure S10.** OER free energy diagrams of  $\text{MN}_4\text{-X}$  ( $\text{X} = \text{Rh}, \text{Pt}, \text{Pd}$ ) structures calculated using the PBE+U method.

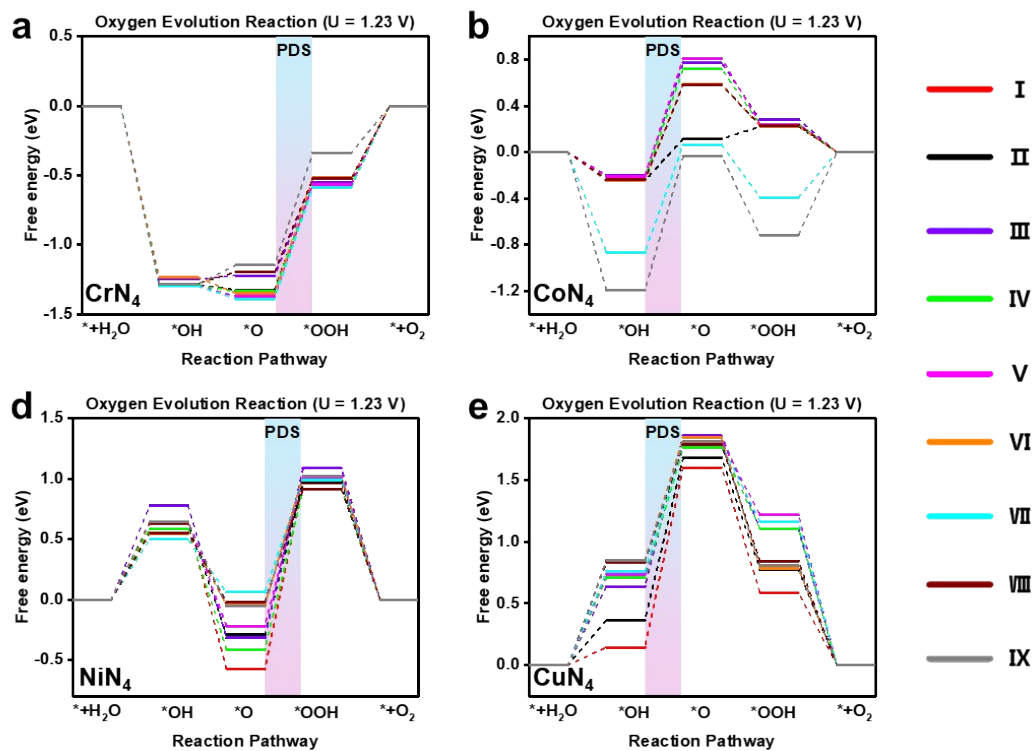

**Figure S11.** OER free energy diagrams of  $\text{MN}_4\text{-X}$  ( $\text{X} = \text{Cr}, \text{Co}, \text{Ni}, \text{Cu}$ ) structures calculated using the PBE+U method.

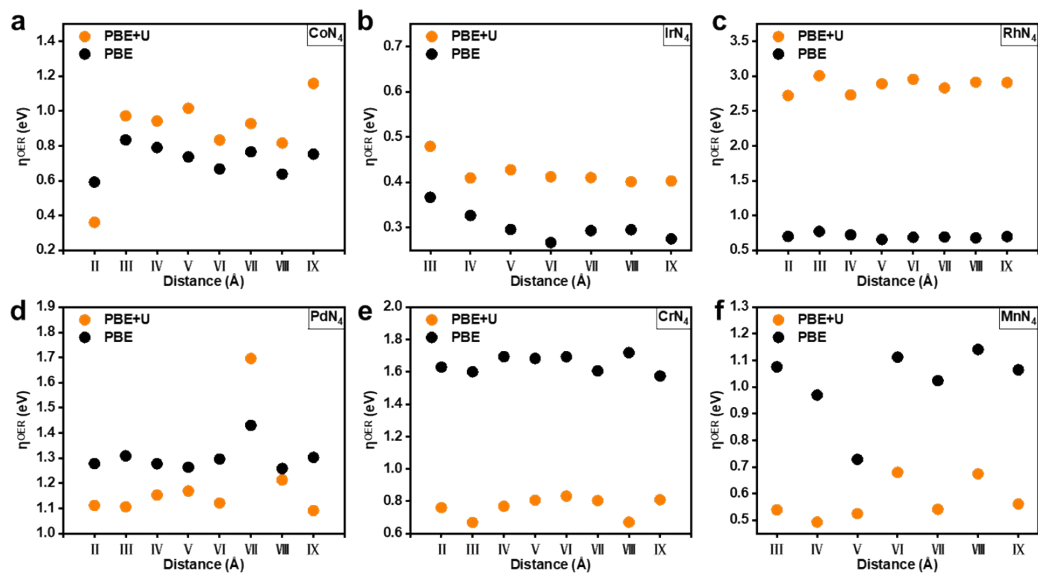

**Figure S12.** Comparison of OER overpotentials for  $\text{MN}_4\text{-X}$  ( $X = \text{Co}, \text{Ir}, \text{Rh}, \text{Pd}, \text{Cr}, \text{Mn}$ ) structures calculated using the PBE and PBE+U methods.

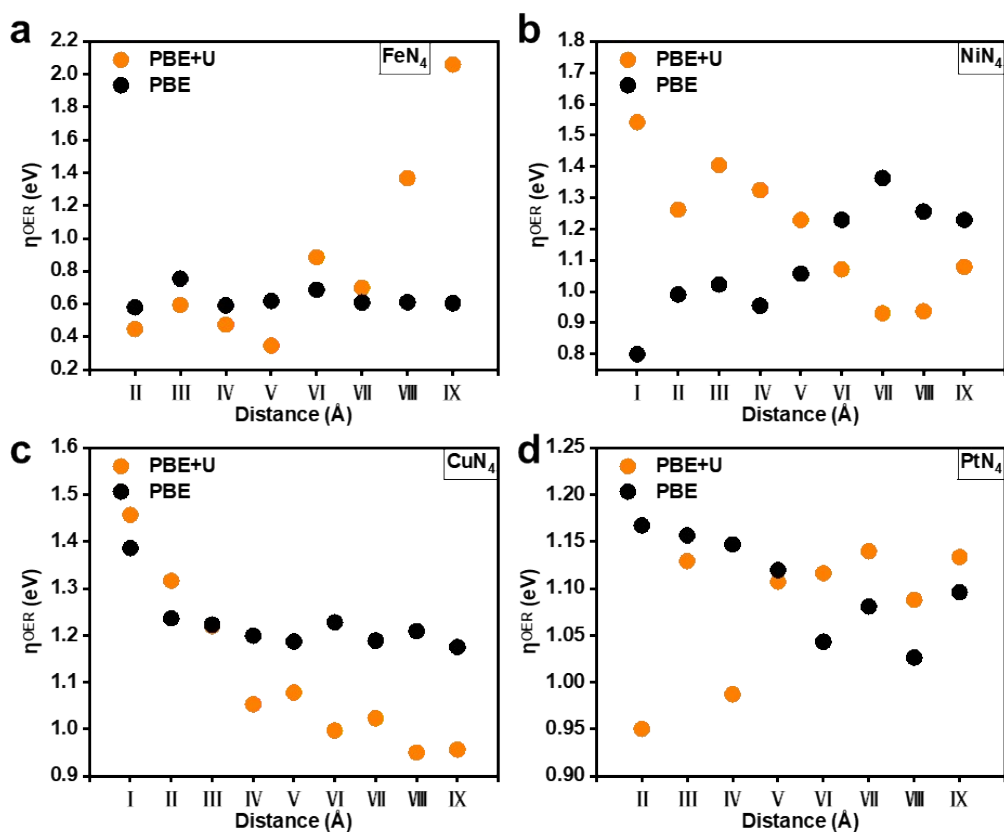

**Figure S13.** Comparison of OER overpotentials for  $\text{MN}_4\text{-X}$  ( $X = \text{Fe}, \text{Ni}, \text{Cu}, \text{Pt}$ ) structures calculated using the PBE and PBE+U methods.

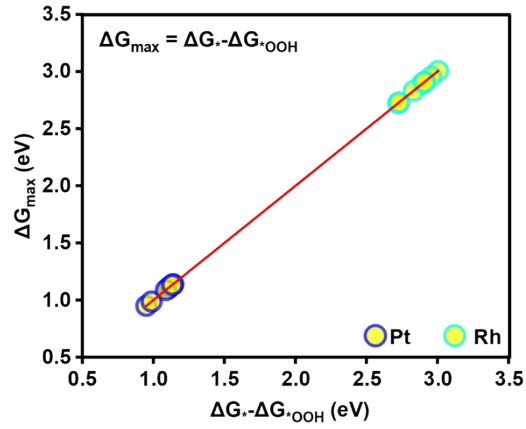

**Figure S14.** MN<sub>4</sub>-X structures where OER overpotential is directly correlated with the energy of the \*OOH to \* step (M = Rh, Pt).

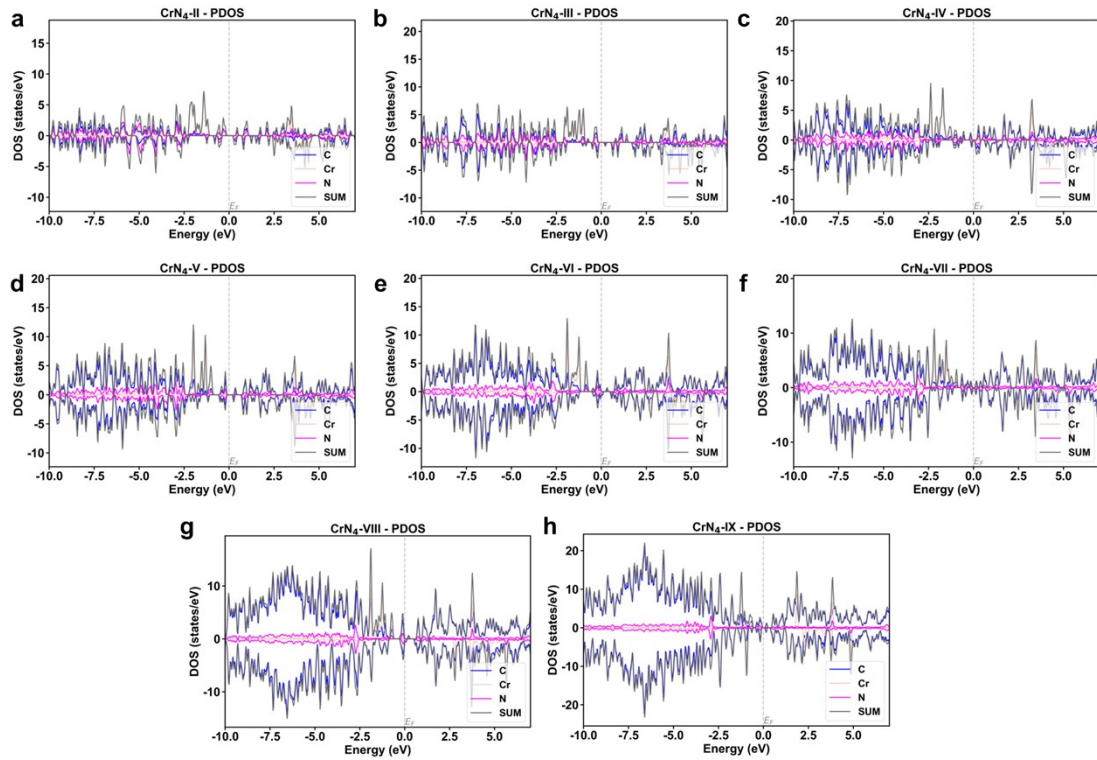

**Figure S15.** Density of states diagrams of CrN<sub>4</sub>-X structures at loading densities from II to IX.

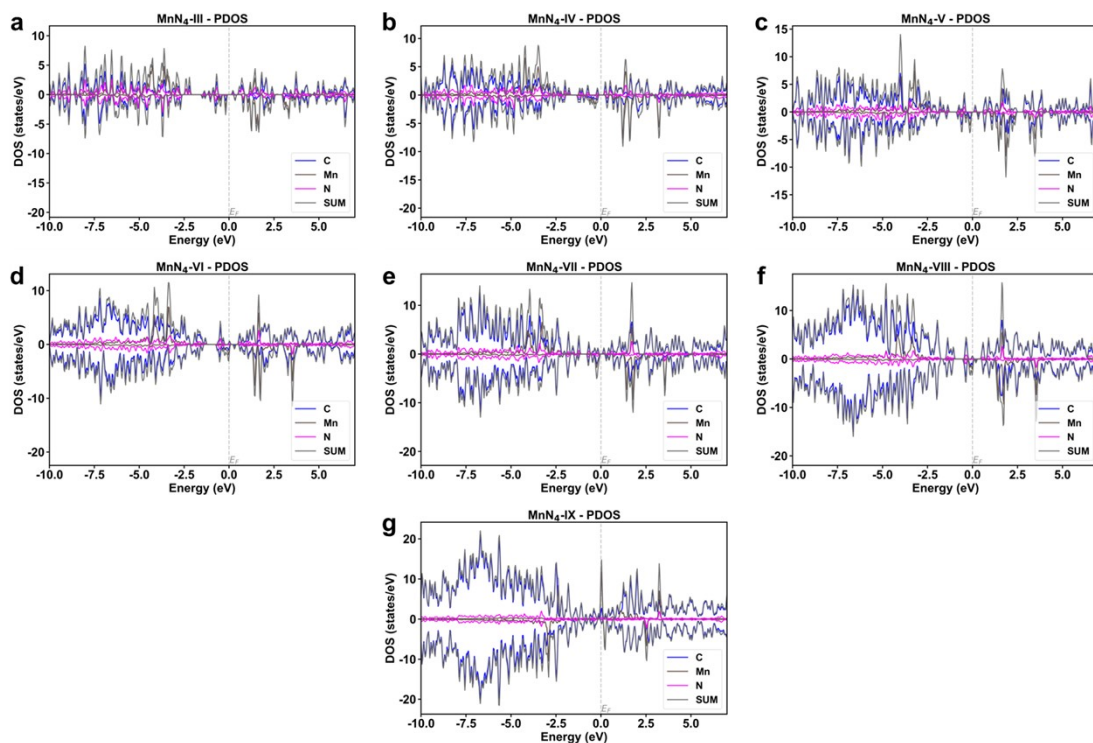

**Figure S16.** Density of states diagrams of  $\text{MnN}_4\text{-X}$  structures at loading densities from III to IX.

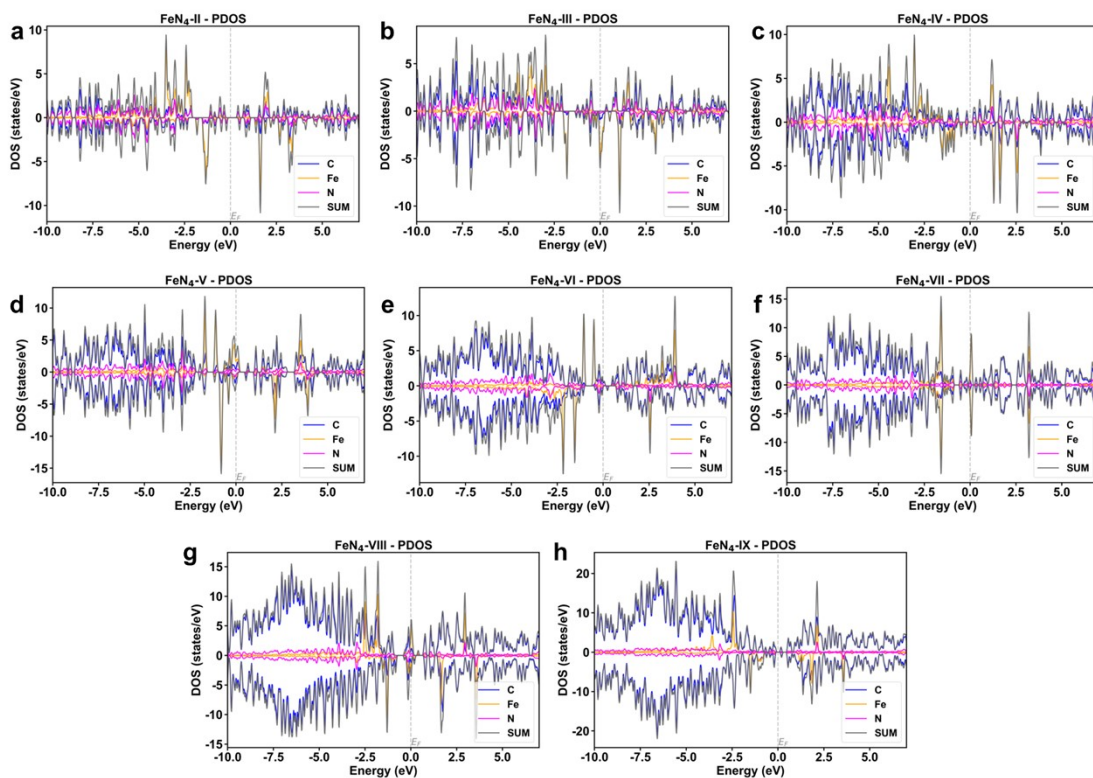

**Figure S17.** Density of states diagrams of  $\text{FeN}_4\text{-X}$  structures at loading densities from II to IX.

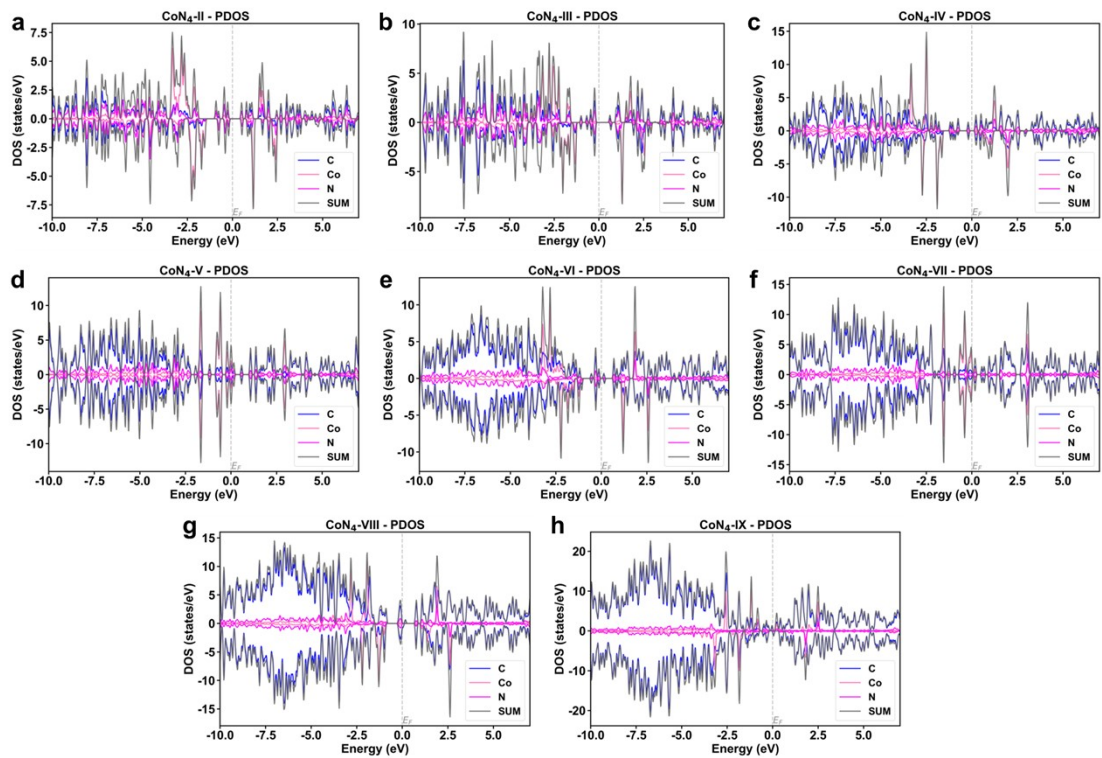

**Figure S18.** Density of states diagrams of  $\text{CoN}_4\text{-X}$  structures at loading densities from II to IX.

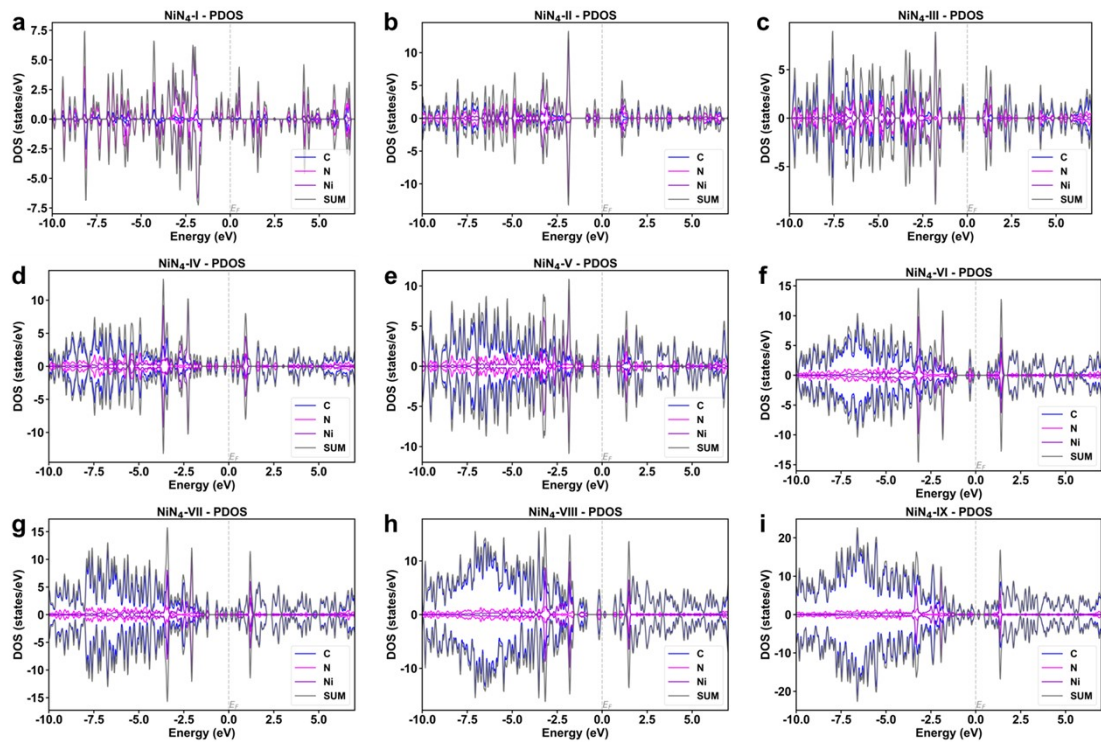

**Figure S19.** Density of states diagrams of  $\text{NiN}_4\text{-X}$  structures at loading densities from I to IX.

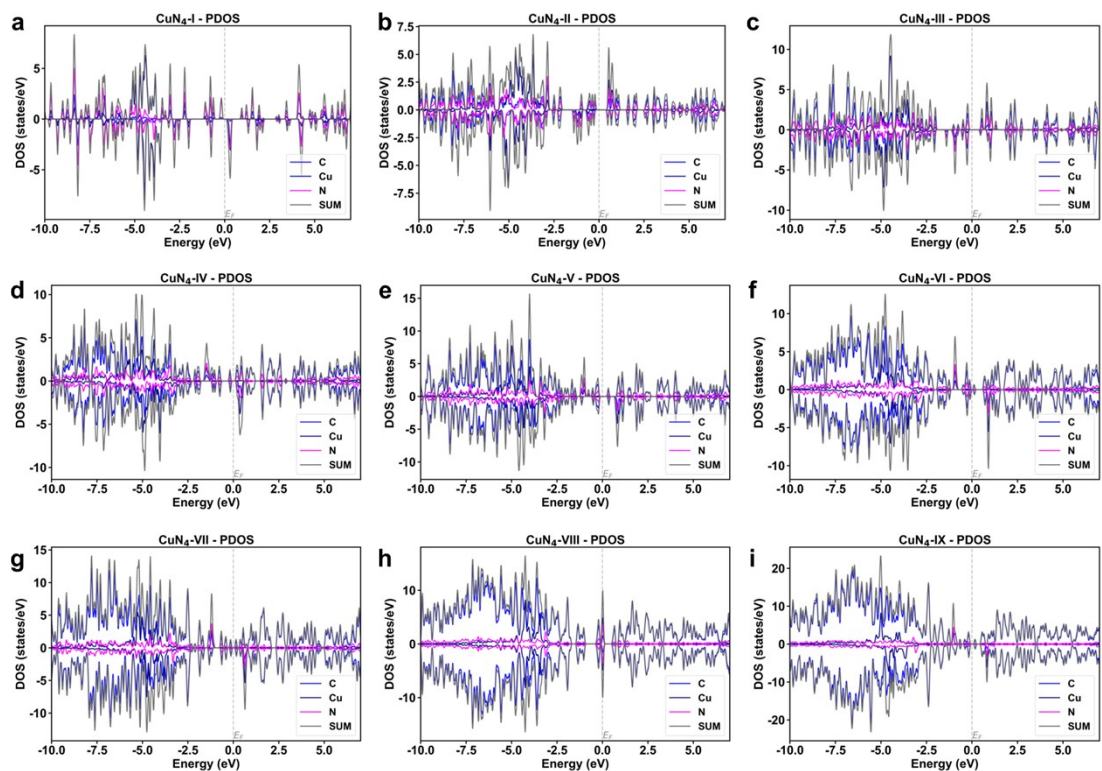

**Figure S20.** Density of states diagrams of  $\text{CuN}_4\text{-X}$  structures at loading densities from I to IX.

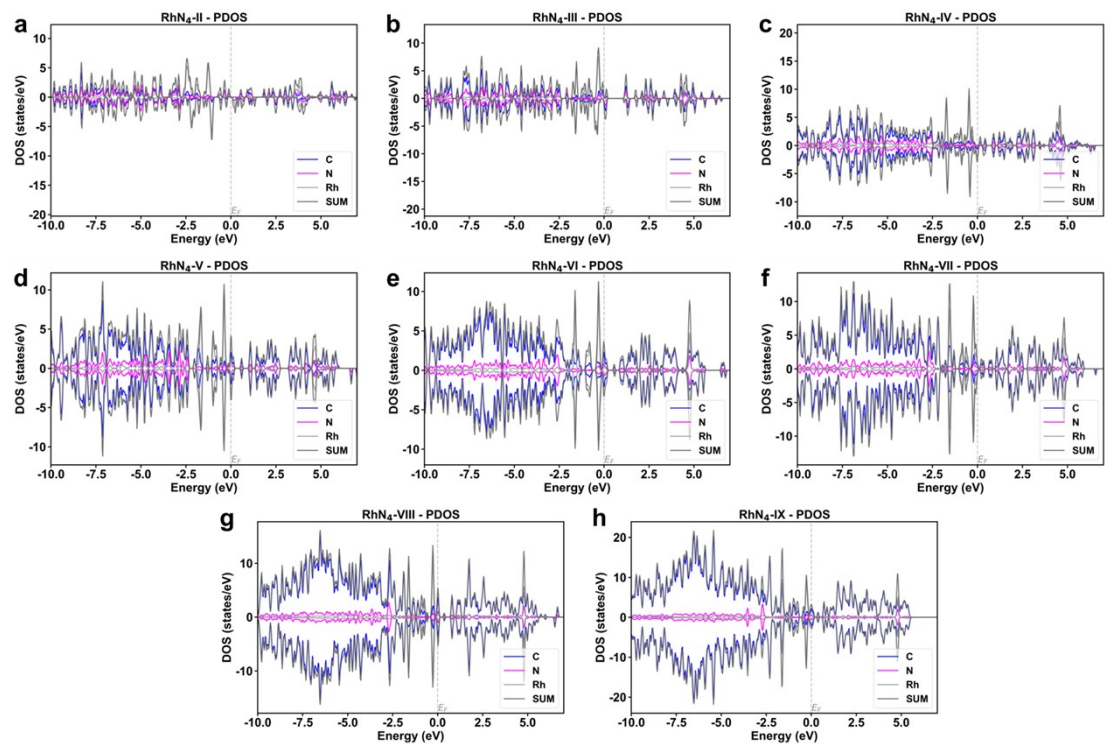

**Figure S21.** Density of states diagrams of  $\text{RhN}_4\text{-X}$  structures at loading densities from II to IX.

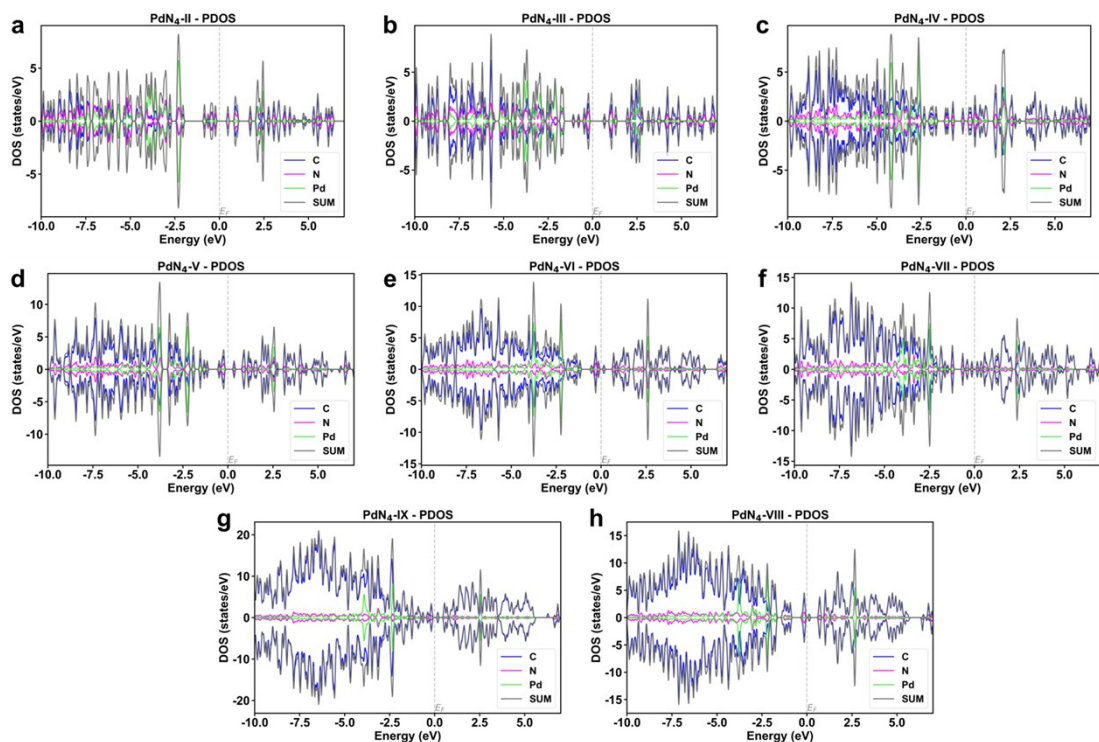

**Figure S22.** Density of states diagrams of PdN<sub>4</sub>-X structures at loading densities from II to IX.

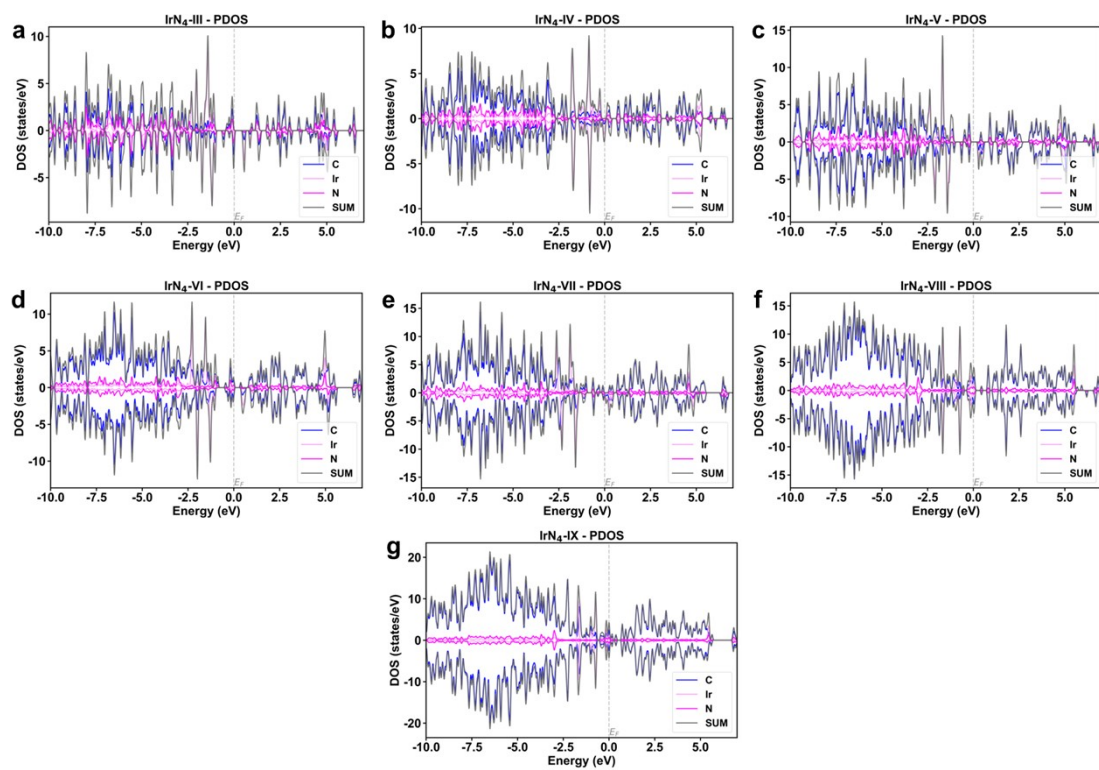

**Figure S23.** Density of states diagrams of IrN<sub>4</sub>-X structures at loading densities from III to IX.

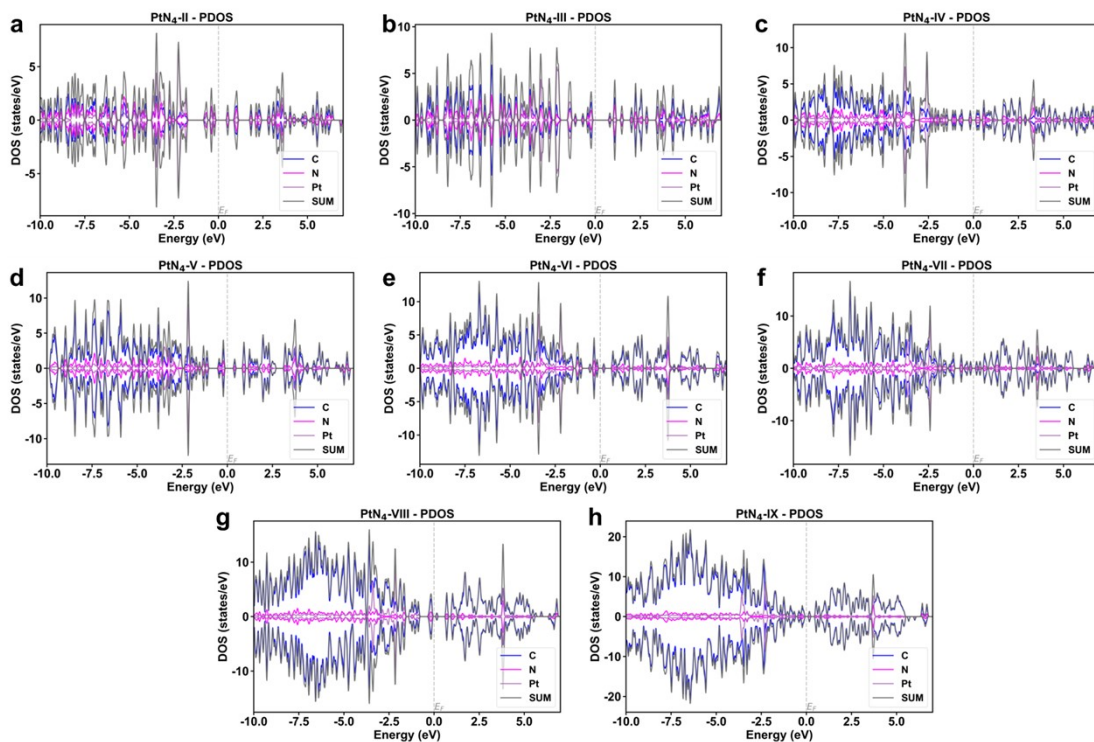

**Figure S24.** Density of states diagrams of  $\text{PtN}_4\text{-X}$  structures at loading densities from II to IX.

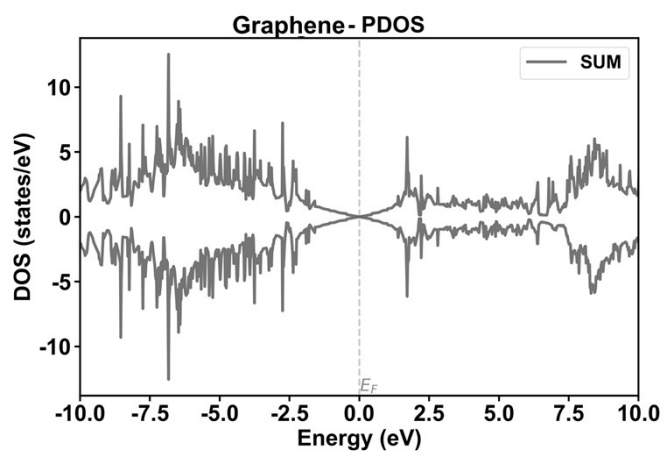

**Figure S25.** Density of states of the pristine graphene structure.

### 3 Supplementary Tables

**Table S1.** Weight percentage (wt%) and atomic percentage (at%) of 3d metals supported on various MN<sub>4</sub>-X substrates.

| 3d-Metal | Number of N | Number of C | Number of M | Relative Atomic Mass of C | Relative Atomic Mass of N | Relative Atomic Mass of M | Weight percentage (wt%) | atomic percentage (at%) |
|----------|-------------|-------------|-------------|---------------------------|---------------------------|---------------------------|-------------------------|-------------------------|
| Sc       | 2           | 4           | 1           | 12.011                    | 14.007                    | 44.956                    | 0.36                    | 0.143                   |
| Sc       | 8           | 4           | 1           | 12.011                    | 14.007                    | 44.956                    | 0.23                    | 0.077                   |
| Sc       | 12          | 4           | 1           | 12.011                    | 14.007                    | 44.956                    | 0.18                    | 0.059                   |
| Sc       | 20          | 4           | 1           | 12.011                    | 14.007                    | 44.956                    | 0.13                    | 0.040                   |
| Sc       | 26          | 4           | 1           | 12.011                    | 14.007                    | 44.956                    | 0.11                    | 0.032                   |
| Sc       | 36          | 4           | 1           | 12.011                    | 14.007                    | 44.956                    | 0.08                    | 0.024                   |
| Sc       | 44          | 4           | 1           | 12.011                    | 14.007                    | 44.956                    | 0.07                    | 0.020                   |
| Sc       | 66          | 4           | 1           | 12.011                    | 14.007                    | 44.956                    | 0.05                    | 0.014                   |
| Sc       | 92          | 4           | 1           | 12.011                    | 14.007                    | 44.956                    | 0.04                    | 0.010                   |
| Ti       | 2           | 4           | 1           | 12.011                    | 14.007                    | 47.876                    | 0.37                    | 0.143                   |
| Ti       | 8           | 4           | 1           | 12.011                    | 14.007                    | 47.876                    | 0.24                    | 0.077                   |
| Ti       | 12          | 4           | 1           | 12.011                    | 14.007                    | 47.876                    | 0.19                    | 0.059                   |
| Ti       | 20          | 4           | 1           | 12.011                    | 14.007                    | 47.876                    | 0.14                    | 0.040                   |
| Ti       | 26          | 4           | 1           | 12.011                    | 14.007                    | 47.876                    | 0.12                    | 0.032                   |
| Ti       | 36          | 4           | 1           | 12.011                    | 14.007                    | 47.876                    | 0.09                    | 0.024                   |
| Ti       | 44          | 4           | 1           | 12.011                    | 14.007                    | 47.876                    | 0.08                    | 0.020                   |
| Ti       | 66          | 4           | 1           | 12.011                    | 14.007                    | 47.876                    | 0.05                    | 0.014                   |
| Ti       | 92          | 4           | 1           | 12.011                    | 14.007                    | 47.876                    | 0.04                    | 0.010                   |
| V        | 2           | 4           | 1           | 12.011                    | 14.007                    | 50.942                    | 0.39                    | 0.143                   |
| V        | 8           | 4           | 1           | 12.011                    | 14.007                    | 50.942                    | 0.25                    | 0.077                   |
| V        | 12          | 4           | 1           | 12.011                    | 14.007                    | 50.942                    | 0.20                    | 0.059                   |
| V        | 20          | 4           | 1           | 12.011                    | 14.007                    | 50.942                    | 0.15                    | 0.040                   |
| V        | 26          | 4           | 1           | 12.011                    | 14.007                    | 50.942                    | 0.12                    | 0.032                   |
| V        | 36          | 4           | 1           | 12.011                    | 14.007                    | 50.942                    | 0.09                    | 0.024                   |

|    |    |   |   |        |        |        |      |       |
|----|----|---|---|--------|--------|--------|------|-------|
| V  | 44 | 4 | 1 | 12.011 | 14.007 | 50.942 | 0.08 | 0.020 |
| V  | 66 | 4 | 1 | 12.011 | 14.007 | 50.942 | 0.06 | 0.014 |
| V  | 92 | 4 | 1 | 12.011 | 14.007 | 50.942 | 0.04 | 0.010 |
| Cr | 2  | 4 | 1 | 12.011 | 14.007 | 51.996 | 0.39 | 0.143 |
| Cr | 8  | 4 | 1 | 12.011 | 14.007 | 51.996 | 0.25 | 0.077 |
| Cr | 12 | 4 | 1 | 12.011 | 14.007 | 51.996 | 0.21 | 0.059 |
| Cr | 20 | 4 | 1 | 12.011 | 14.007 | 51.996 | 0.15 | 0.040 |
| Cr | 26 | 4 | 1 | 12.011 | 14.007 | 51.996 | 0.12 | 0.032 |
| Cr | 36 | 4 | 1 | 12.011 | 14.007 | 51.996 | 0.10 | 0.024 |
| Cr | 44 | 4 | 1 | 12.011 | 14.007 | 51.996 | 0.08 | 0.020 |
| Cr | 66 | 4 | 1 | 12.011 | 14.007 | 51.996 | 0.06 | 0.014 |
| Cr | 92 | 4 | 1 | 12.011 | 14.007 | 51.996 | 0.04 | 0.010 |
| Mn | 2  | 4 | 1 | 12.011 | 14.007 | 54.938 | 0.41 | 0.143 |
| Mn | 8  | 4 | 1 | 12.011 | 14.007 | 54.938 | 0.27 | 0.077 |
| Mn | 12 | 4 | 1 | 12.011 | 14.007 | 54.938 | 0.22 | 0.059 |
| Mn | 20 | 4 | 1 | 12.011 | 14.007 | 54.938 | 0.16 | 0.040 |
| Mn | 26 | 4 | 1 | 12.011 | 14.007 | 54.938 | 0.13 | 0.032 |
| Mn | 36 | 4 | 1 | 12.011 | 14.007 | 54.938 | 0.10 | 0.024 |
| Mn | 44 | 4 | 1 | 12.011 | 14.007 | 54.938 | 0.09 | 0.020 |
| Mn | 66 | 4 | 1 | 12.011 | 14.007 | 54.938 | 0.06 | 0.014 |
| Mn | 92 | 4 | 1 | 12.011 | 14.007 | 54.938 | 0.05 | 0.010 |
| Fe | 2  | 4 | 1 | 12.011 | 14.007 | 55.845 | 0.41 | 0.143 |
| Fe | 8  | 4 | 1 | 12.011 | 14.007 | 55.845 | 0.27 | 0.077 |
| Fe | 12 | 4 | 1 | 12.011 | 14.007 | 55.845 | 0.22 | 0.059 |
| Fe | 20 | 4 | 1 | 12.011 | 14.007 | 55.845 | 0.16 | 0.040 |
| Fe | 26 | 4 | 1 | 12.011 | 14.007 | 55.845 | 0.13 | 0.032 |
| Fe | 36 | 4 | 1 | 12.011 | 14.007 | 55.845 | 0.10 | 0.024 |
| Fe | 44 | 4 | 1 | 12.011 | 14.007 | 55.845 | 0.09 | 0.020 |
| Fe | 66 | 4 | 1 | 12.011 | 14.007 | 55.845 | 0.06 | 0.014 |
| Fe | 92 | 4 | 1 | 12.011 | 14.007 | 55.845 | 0.05 | 0.010 |

|    |    |   |   |        |        |        |      |       |
|----|----|---|---|--------|--------|--------|------|-------|
| Co | 2  | 4 | 1 | 12.011 | 14.007 | 58.933 | 0.42 | 0.143 |
| Co | 8  | 4 | 1 | 12.011 | 14.007 | 58.933 | 0.28 | 0.077 |
| Co | 12 | 4 | 1 | 12.011 | 14.007 | 58.933 | 0.23 | 0.059 |
| Co | 20 | 4 | 1 | 12.011 | 14.007 | 58.933 | 0.17 | 0.040 |
| Co | 26 | 4 | 1 | 12.011 | 14.007 | 58.933 | 0.14 | 0.032 |
| Co | 36 | 4 | 1 | 12.011 | 14.007 | 58.933 | 0.11 | 0.024 |
| Co | 44 | 4 | 1 | 12.011 | 14.007 | 58.933 | 0.09 | 0.020 |
| Co | 66 | 4 | 1 | 12.011 | 14.007 | 58.933 | 0.06 | 0.014 |
| Co | 92 | 4 | 1 | 12.011 | 14.007 | 58.933 | 0.05 | 0.010 |
| Ni | 2  | 4 | 1 | 12.011 | 14.007 | 58.693 | 0.42 | 0.143 |
| Ni | 8  | 4 | 1 | 12.011 | 14.007 | 58.693 | 0.28 | 0.077 |
| Ni | 12 | 4 | 1 | 12.011 | 14.007 | 58.693 | 0.23 | 0.059 |
| Ni | 20 | 4 | 1 | 12.011 | 14.007 | 58.693 | 0.17 | 0.040 |
| Ni | 26 | 4 | 1 | 12.011 | 14.007 | 58.693 | 0.14 | 0.032 |
| Ni | 36 | 4 | 1 | 12.011 | 14.007 | 58.693 | 0.11 | 0.024 |
| Ni | 44 | 4 | 1 | 12.011 | 14.007 | 58.693 | 0.09 | 0.020 |
| Ni | 66 | 4 | 1 | 12.011 | 14.007 | 58.693 | 0.06 | 0.014 |
| Ni | 92 | 4 | 1 | 12.011 | 14.007 | 58.693 | 0.05 | 0.010 |
| Cu | 2  | 4 | 1 | 12.011 | 14.007 | 63.546 | 0.44 | 0.143 |
| Cu | 8  | 4 | 1 | 12.011 | 14.007 | 63.546 | 0.29 | 0.077 |
| Cu | 12 | 4 | 1 | 12.011 | 14.007 | 63.546 | 0.24 | 0.059 |
| Cu | 20 | 4 | 1 | 12.011 | 14.007 | 63.546 | 0.18 | 0.040 |
| Cu | 26 | 4 | 1 | 12.011 | 14.007 | 63.546 | 0.15 | 0.032 |
| Cu | 36 | 4 | 1 | 12.011 | 14.007 | 63.546 | 0.12 | 0.024 |
| Cu | 44 | 4 | 1 | 12.011 | 14.007 | 63.546 | 0.10 | 0.020 |
| Cu | 66 | 4 | 1 | 12.011 | 14.007 | 63.546 | 0.07 | 0.014 |
| Cu | 92 | 4 | 1 | 12.011 | 14.007 | 63.546 | 0.05 | 0.010 |
| Zn | 2  | 4 | 1 | 12.011 | 14.007 | 65.38  | 0.45 | 0.143 |
| Zn | 8  | 4 | 1 | 12.011 | 14.007 | 65.38  | 0.30 | 0.077 |
| Zn | 12 | 4 | 1 | 12.011 | 14.007 | 65.38  | 0.25 | 0.059 |

|    |    |   |   |        |        |       |      |       |
|----|----|---|---|--------|--------|-------|------|-------|
| Zn | 20 | 4 | 1 | 12.011 | 14.007 | 65.38 | 0.18 | 0.040 |
| Zn | 26 | 4 | 1 | 12.011 | 14.007 | 65.38 | 0.15 | 0.032 |
| Zn | 36 | 4 | 1 | 12.011 | 14.007 | 65.38 | 0.12 | 0.024 |
| Zn | 44 | 4 | 1 | 12.011 | 14.007 | 65.38 | 0.10 | 0.020 |
| Zn | 66 | 4 | 1 | 12.011 | 14.007 | 65.38 | 0.07 | 0.014 |
| Zn | 92 | 4 | 1 | 12.011 | 14.007 | 65.38 | 0.05 | 0.010 |

**Table S2.** Weight percentage (wt%) and atomic percentage (at%) of 4d metals supported on various MN<sub>4</sub>-X substrates.

| 4d-Metal | Number of N | Number of C | Number of M | Relative Atomic Mass of C | Relative Atomic Mass of N | Relative Atomic Mass of M | Weight percentage (wt%) | atomic percentage (at%) |
|----------|-------------|-------------|-------------|---------------------------|---------------------------|---------------------------|-------------------------|-------------------------|
| Y        | 2           | 4           | 1           | 12.011                    | 14.007                    | 88.906                    | 0.53                    | 0.143                   |
| Y        | 8           | 4           | 1           | 12.011                    | 14.007                    | 88.906                    | 0.37                    | 0.077                   |
| Y        | 12          | 4           | 1           | 12.011                    | 14.007                    | 88.906                    | 0.31                    | 0.059                   |
| Y        | 20          | 4           | 1           | 12.011                    | 14.007                    | 88.906                    | 0.23                    | 0.040                   |
| Y        | 26          | 4           | 1           | 12.011                    | 14.007                    | 88.906                    | 0.19                    | 0.032                   |
| Y        | 36          | 4           | 1           | 12.011                    | 14.007                    | 88.906                    | 0.15                    | 0.024                   |
| Y        | 44          | 4           | 1           | 12.011                    | 14.007                    | 88.906                    | 0.13                    | 0.020                   |
| Y        | 66          | 4           | 1           | 12.011                    | 14.007                    | 88.906                    | 0.09                    | 0.014                   |
| Y        | 92          | 4           | 1           | 12.011                    | 14.007                    | 88.906                    | 0.07                    | 0.010                   |
| Zr       | 2           | 4           | 1           | 12.011                    | 14.007                    | 91.224                    | 0.53                    | 0.143                   |
| Zr       | 8           | 4           | 1           | 12.011                    | 14.007                    | 91.224                    | 0.37                    | 0.077                   |
| Zr       | 12          | 4           | 1           | 12.011                    | 14.007                    | 91.224                    | 0.31                    | 0.059                   |
| Zr       | 20          | 4           | 1           | 12.011                    | 14.007                    | 91.224                    | 0.24                    | 0.040                   |
| Zr       | 26          | 4           | 1           | 12.011                    | 14.007                    | 91.224                    | 0.20                    | 0.032                   |
| Zr       | 36          | 4           | 1           | 12.011                    | 14.007                    | 91.224                    | 0.16                    | 0.024                   |
| Zr       | 44          | 4           | 1           | 12.011                    | 14.007                    | 91.224                    | 0.13                    | 0.020                   |
| Zr       | 66          | 4           | 1           | 12.011                    | 14.007                    | 91.224                    | 0.10                    | 0.014                   |
| Zr       | 92          | 4           | 1           | 12.011                    | 14.007                    | 91.224                    | 0.07                    | 0.010                   |
| Nb       | 2           | 4           | 1           | 12.011                    | 14.007                    | 92.906                    | 0.54                    | 0.143                   |
| Nb       | 8           | 4           | 1           | 12.011                    | 14.007                    | 92.906                    | 0.38                    | 0.077                   |
| Nb       | 12          | 4           | 1           | 12.011                    | 14.007                    | 92.906                    | 0.32                    | 0.059                   |
| Nb       | 20          | 4           | 1           | 12.011                    | 14.007                    | 92.906                    | 0.24                    | 0.040                   |
| Nb       | 26          | 4           | 1           | 12.011                    | 14.007                    | 92.906                    | 0.20                    | 0.032                   |
| Nb       | 36          | 4           | 1           | 12.011                    | 14.007                    | 92.906                    | 0.16                    | 0.024                   |
| Nb       | 44          | 4           | 1           | 12.011                    | 14.007                    | 92.906                    | 0.14                    | 0.020                   |

|    |    |   |   |        |        |        |      |       |
|----|----|---|---|--------|--------|--------|------|-------|
| Nb | 66 | 4 | 1 | 12.011 | 14.007 | 92.906 | 0.10 | 0.014 |
| Nb | 92 | 4 | 1 | 12.011 | 14.007 | 92.906 | 0.07 | 0.010 |
| Mo | 2  | 4 | 1 | 12.011 | 14.007 | 95.95  | 0.55 | 0.143 |
| Mo | 8  | 4 | 1 | 12.011 | 14.007 | 95.95  | 0.39 | 0.077 |
| Mo | 12 | 4 | 1 | 12.011 | 14.007 | 95.95  | 0.32 | 0.059 |
| Mo | 20 | 4 | 1 | 12.011 | 14.007 | 95.95  | 0.24 | 0.040 |
| Mo | 26 | 4 | 1 | 12.011 | 14.007 | 95.95  | 0.21 | 0.032 |
| Mo | 36 | 4 | 1 | 12.011 | 14.007 | 95.95  | 0.16 | 0.024 |
| Mo | 44 | 4 | 1 | 12.011 | 14.007 | 95.95  | 0.14 | 0.020 |
| Mo | 66 | 4 | 1 | 12.011 | 14.007 | 95.95  | 0.10 | 0.014 |
| Mo | 92 | 4 | 1 | 12.011 | 14.007 | 95.95  | 0.08 | 0.010 |
| Ru | 2  | 4 | 1 | 12.011 | 14.007 | 101.07 | 0.56 | 0.143 |
| Ru | 8  | 4 | 1 | 12.011 | 14.007 | 101.07 | 0.40 | 0.077 |
| Ru | 12 | 4 | 1 | 12.011 | 14.007 | 101.07 | 0.34 | 0.059 |
| Ru | 20 | 4 | 1 | 12.011 | 14.007 | 101.07 | 0.25 | 0.040 |
| Ru | 26 | 4 | 1 | 12.011 | 14.007 | 101.07 | 0.22 | 0.032 |
| Ru | 36 | 4 | 1 | 12.011 | 14.007 | 101.07 | 0.17 | 0.024 |
| Ru | 44 | 4 | 1 | 12.011 | 14.007 | 101.07 | 0.15 | 0.020 |
| Ru | 66 | 4 | 1 | 12.011 | 14.007 | 101.07 | 0.11 | 0.014 |
| Ru | 92 | 4 | 1 | 12.011 | 14.007 | 101.07 | 0.08 | 0.010 |
| Rh | 2  | 4 | 1 | 12.011 | 14.007 | 102.91 | 0.56 | 0.143 |
| Rh | 8  | 4 | 1 | 12.011 | 14.007 | 102.91 | 0.40 | 0.077 |
| Rh | 12 | 4 | 1 | 12.011 | 14.007 | 102.91 | 0.34 | 0.059 |
| Rh | 20 | 4 | 1 | 12.011 | 14.007 | 102.91 | 0.26 | 0.040 |
| Rh | 26 | 4 | 1 | 12.011 | 14.007 | 102.91 | 0.22 | 0.032 |
| Rh | 36 | 4 | 1 | 12.011 | 14.007 | 102.91 | 0.17 | 0.024 |
| Rh | 44 | 4 | 1 | 12.011 | 14.007 | 102.91 | 0.15 | 0.020 |
| Rh | 66 | 4 | 1 | 12.011 | 14.007 | 102.91 | 0.11 | 0.014 |
| Rh | 92 | 4 | 1 | 12.011 | 14.007 | 102.91 | 0.08 | 0.010 |
| Pd | 2  | 4 | 1 | 12.011 | 14.007 | 106.42 | 0.57 | 0.143 |

|    |    |   |   |        |        |        |      |       |
|----|----|---|---|--------|--------|--------|------|-------|
| Pd | 8  | 4 | 1 | 12.011 | 14.007 | 106.42 | 0.41 | 0.077 |
| Pd | 12 | 4 | 1 | 12.011 | 14.007 | 106.42 | 0.35 | 0.059 |
| Pd | 20 | 4 | 1 | 12.011 | 14.007 | 106.42 | 0.26 | 0.040 |
| Pd | 26 | 4 | 1 | 12.011 | 14.007 | 106.42 | 0.22 | 0.032 |
| Pd | 36 | 4 | 1 | 12.011 | 14.007 | 106.42 | 0.18 | 0.024 |
| Pd | 44 | 4 | 1 | 12.011 | 14.007 | 106.42 | 0.15 | 0.020 |
| Pd | 66 | 4 | 1 | 12.011 | 14.007 | 106.42 | 0.11 | 0.014 |
| Pd | 92 | 4 | 1 | 12.011 | 14.007 | 106.42 | 0.08 | 0.010 |
| Ag | 2  | 4 | 1 | 12.011 | 14.007 | 107.87 | 0.57 | 0.143 |
| Ag | 8  | 4 | 1 | 12.011 | 14.007 | 107.87 | 0.41 | 0.077 |
| Ag | 12 | 4 | 1 | 12.011 | 14.007 | 107.87 | 0.35 | 0.059 |
| Ag | 20 | 4 | 1 | 12.011 | 14.007 | 107.87 | 0.27 | 0.040 |
| Ag | 26 | 4 | 1 | 12.011 | 14.007 | 107.87 | 0.23 | 0.032 |
| Ag | 36 | 4 | 1 | 12.011 | 14.007 | 107.87 | 0.18 | 0.024 |
| Ag | 44 | 4 | 1 | 12.011 | 14.007 | 107.87 | 0.16 | 0.020 |
| Ag | 66 | 4 | 1 | 12.011 | 14.007 | 107.87 | 0.11 | 0.014 |
| Ag | 92 | 4 | 1 | 12.011 | 14.007 | 107.87 | 0.09 | 0.010 |

**Table S3.** Weight percentage (wt%) and atomic percentage (at%) of 5d metals supported on various MN<sub>4</sub>-X substrates.

| <b>5d-Metal</b> | <b>Number of N</b> | <b>Number of C</b> | <b>Number of M</b> | <b>Relative Atomic Mass of C</b> | <b>Relative Atomic Mass of N</b> | <b>Relative Atomic Mass of M</b> | <b>Weight percentage (wt%)</b> | <b>atomic percentage (at%)</b> |
|-----------------|--------------------|--------------------|--------------------|----------------------------------|----------------------------------|----------------------------------|--------------------------------|--------------------------------|
| Hf              | 2                  | 4                  | 1                  | 12.011                           | 14.007                           | 178.49                           | 0.69                           | 0.143                          |
| Hf              | 8                  | 4                  | 1                  | 12.011                           | 14.007                           | 178.49                           | 0.54                           | 0.077                          |
| Hf              | 12                 | 4                  | 1                  | 12.011                           | 14.007                           | 178.49                           | 0.47                           | 0.059                          |
| Hf              | 20                 | 4                  | 1                  | 12.011                           | 14.007                           | 178.49                           | 0.38                           | 0.040                          |
| Hf              | 26                 | 4                  | 1                  | 12.011                           | 14.007                           | 178.49                           | 0.33                           | 0.032                          |
| Hf              | 36                 | 4                  | 1                  | 12.011                           | 14.007                           | 178.49                           | 0.27                           | 0.024                          |
| Hf              | 44                 | 4                  | 1                  | 12.011                           | 14.007                           | 178.49                           | 0.23                           | 0.020                          |
| Hf              | 66                 | 4                  | 1                  | 12.011                           | 14.007                           | 178.49                           | 0.17                           | 0.014                          |
| Hf              | 92                 | 4                  | 1                  | 12.011                           | 14.007                           | 178.49                           | 0.13                           | 0.010                          |
| Ta              | 2                  | 4                  | 1                  | 12.011                           | 14.007                           | 180.95                           | 0.69                           | 0.143                          |
| Ta              | 8                  | 4                  | 1                  | 12.011                           | 14.007                           | 180.95                           | 0.54                           | 0.077                          |
| Ta              | 12                 | 4                  | 1                  | 12.011                           | 14.007                           | 180.95                           | 0.47                           | 0.059                          |
| Ta              | 20                 | 4                  | 1                  | 12.011                           | 14.007                           | 180.95                           | 0.38                           | 0.040                          |
| Ta              | 26                 | 4                  | 1                  | 12.011                           | 14.007                           | 180.95                           | 0.33                           | 0.032                          |
| Ta              | 36                 | 4                  | 1                  | 12.011                           | 14.007                           | 180.95                           | 0.27                           | 0.024                          |
| Ta              | 44                 | 4                  | 1                  | 12.011                           | 14.007                           | 180.95                           | 0.24                           | 0.020                          |
| Ta              | 66                 | 4                  | 1                  | 12.011                           | 14.007                           | 180.95                           | 0.18                           | 0.014                          |
| Ta              | 92                 | 4                  | 1                  | 12.011                           | 14.007                           | 180.95                           | 0.13                           | 0.010                          |
| W               | 2                  | 4                  | 1                  | 12.011                           | 14.007                           | 183.84                           | 0.70                           | 0.143                          |
| W               | 8                  | 4                  | 1                  | 12.011                           | 14.007                           | 183.84                           | 0.55                           | 0.077                          |
| W               | 12                 | 4                  | 1                  | 12.011                           | 14.007                           | 183.84                           | 0.48                           | 0.059                          |
| W               | 20                 | 4                  | 1                  | 12.011                           | 14.007                           | 183.84                           | 0.38                           | 0.040                          |
| W               | 26                 | 4                  | 1                  | 12.011                           | 14.007                           | 183.84                           | 0.33                           | 0.032                          |
| W               | 36                 | 4                  | 1                  | 12.011                           | 14.007                           | 183.84                           | 0.27                           | 0.024                          |
| W               | 44                 | 4                  | 1                  | 12.011                           | 14.007                           | 183.84                           | 0.24                           | 0.020                          |

|    |    |   |   |        |        |        |      |       |
|----|----|---|---|--------|--------|--------|------|-------|
| W  | 66 | 4 | 1 | 12.011 | 14.007 | 183.84 | 0.18 | 0.014 |
| W  | 92 | 4 | 1 | 12.011 | 14.007 | 183.84 | 0.14 | 0.010 |
| Re | 2  | 4 | 1 | 12.011 | 14.007 | 186.21 | 0.70 | 0.143 |
| Re | 8  | 4 | 1 | 12.011 | 14.007 | 186.21 | 0.55 | 0.077 |
| Re | 12 | 4 | 1 | 12.011 | 14.007 | 186.21 | 0.48 | 0.059 |
| Re | 20 | 4 | 1 | 12.011 | 14.007 | 186.21 | 0.39 | 0.040 |
| Re | 26 | 4 | 1 | 12.011 | 14.007 | 186.21 | 0.34 | 0.032 |
| Re | 36 | 4 | 1 | 12.011 | 14.007 | 186.21 | 0.28 | 0.024 |
| Re | 44 | 4 | 1 | 12.011 | 14.007 | 186.21 | 0.24 | 0.020 |
| Re | 66 | 4 | 1 | 12.011 | 14.007 | 186.21 | 0.18 | 0.014 |
| Re | 92 | 4 | 1 | 12.011 | 14.007 | 186.21 | 0.14 | 0.010 |
| Os | 2  | 4 | 1 | 12.011 | 14.007 | 190.23 | 0.70 | 0.143 |
| Os | 8  | 4 | 1 | 12.011 | 14.007 | 190.23 | 0.56 | 0.077 |
| Os | 12 | 4 | 1 | 12.011 | 14.007 | 190.23 | 0.49 | 0.059 |
| Os | 20 | 4 | 1 | 12.011 | 14.007 | 190.23 | 0.39 | 0.040 |
| Os | 26 | 4 | 1 | 12.011 | 14.007 | 190.23 | 0.34 | 0.032 |
| Os | 36 | 4 | 1 | 12.011 | 14.007 | 190.23 | 0.28 | 0.024 |
| Os | 44 | 4 | 1 | 12.011 | 14.007 | 190.23 | 0.25 | 0.020 |
| Os | 66 | 4 | 1 | 12.011 | 14.007 | 190.23 | 0.18 | 0.014 |
| Os | 92 | 4 | 1 | 12.011 | 14.007 | 190.23 | 0.14 | 0.010 |
| Ir | 2  | 4 | 1 | 12.011 | 14.007 | 192.22 | 0.71 | 0.143 |
| Ir | 8  | 4 | 1 | 12.011 | 14.007 | 192.22 | 0.56 | 0.077 |
| Ir | 12 | 4 | 1 | 12.011 | 14.007 | 192.22 | 0.49 | 0.059 |
| Ir | 20 | 4 | 1 | 12.011 | 14.007 | 192.22 | 0.39 | 0.040 |
| Ir | 26 | 4 | 1 | 12.011 | 14.007 | 192.22 | 0.34 | 0.032 |
| Ir | 36 | 4 | 1 | 12.011 | 14.007 | 192.22 | 0.28 | 0.024 |
| Ir | 44 | 4 | 1 | 12.011 | 14.007 | 192.22 | 0.25 | 0.020 |
| Ir | 66 | 4 | 1 | 12.011 | 14.007 | 192.22 | 0.18 | 0.014 |
| Ir | 92 | 4 | 1 | 12.011 | 14.007 | 192.22 | 0.14 | 0.010 |
| Pt | 2  | 4 | 1 | 12.011 | 14.007 | 195.08 | 0.71 | 0.143 |

|    |    |   |   |        |        |        |      |       |
|----|----|---|---|--------|--------|--------|------|-------|
| Pt | 8  | 4 | 1 | 12.011 | 14.007 | 195.08 | 0.56 | 0.077 |
| Pt | 12 | 4 | 1 | 12.011 | 14.007 | 195.08 | 0.49 | 0.059 |
| Pt | 20 | 4 | 1 | 12.011 | 14.007 | 195.08 | 0.40 | 0.040 |
| Pt | 26 | 4 | 1 | 12.011 | 14.007 | 195.08 | 0.35 | 0.032 |
| Pt | 36 | 4 | 1 | 12.011 | 14.007 | 195.08 | 0.29 | 0.024 |
| Pt | 44 | 4 | 1 | 12.011 | 14.007 | 195.08 | 0.25 | 0.020 |
| Pt | 66 | 4 | 1 | 12.011 | 14.007 | 195.08 | 0.19 | 0.014 |
| Pt | 92 | 4 | 1 | 12.011 | 14.007 | 195.08 | 0.14 | 0.010 |
| Au | 2  | 4 | 1 | 12.011 | 14.007 | 196.97 | 0.71 | 0.143 |
| Au | 8  | 4 | 1 | 12.011 | 14.007 | 196.97 | 0.56 | 0.077 |
| Au | 12 | 4 | 1 | 12.011 | 14.007 | 196.97 | 0.50 | 0.059 |
| Au | 20 | 4 | 1 | 12.011 | 14.007 | 196.97 | 0.40 | 0.040 |
| Au | 26 | 4 | 1 | 12.011 | 14.007 | 196.97 | 0.35 | 0.032 |
| Au | 36 | 4 | 1 | 12.011 | 14.007 | 196.97 | 0.29 | 0.024 |
| Au | 44 | 4 | 1 | 12.011 | 14.007 | 196.97 | 0.25 | 0.020 |
| Au | 66 | 4 | 1 | 12.011 | 14.007 | 196.97 | 0.19 | 0.014 |
| Au | 92 | 4 | 1 | 12.011 | 14.007 | 196.97 | 0.15 | 0.010 |

**Table S4.** Comparison of converged magnetic moments and energies for the bare FeN<sub>4</sub> structure and its \*H, \*OH, \*O, and \*OOH structures under different initial magnetic moment settings (0, 2, 4, 5).

| Structure              | Magnetic moment ( $\mu\text{B}$ ) |        |        |        | Energy (eV)  |              |              |
|------------------------|-----------------------------------|--------|--------|--------|--------------|--------------|--------------|
|                        | 0                                 | 2      | 4      | 5      | $\Delta 2-0$ | $\Delta 4-0$ | $\Delta 5-0$ |
| <b>*</b>               |                                   |        |        |        |              |              |              |
| FeN <sub>4</sub> -I    | 0.055                             | 1.606  | 1.606  | 1.606  | -0.33        | -0.33        | -0.33        |
| FeN <sub>4</sub> -II   | -0.031                            | 1.816  | 1.816  | 1.816  | -0.50        | -0.50        | -0.50        |
| FeN <sub>4</sub> -III  | -0.217                            | 1.899  | 1.899  | 1.899  | -0.61        | -0.61        | -0.61        |
| FeN <sub>4</sub> -IV   | 0.580                             | 1.848  | 0.418  | -1.765 | -0.39        | 0.01         | -0.23        |
| FeN <sub>4</sub> -V    | -0.365                            | 0.378  | -1.850 | 0.323  | 0.00         | -0.51        | 0.04         |
| FeN <sub>4</sub> -VI   | 0.706                             | 0.939  | 1.836  | 1.669  | 0.00         | 4.34         | 1.92         |
| FeN <sub>4</sub> -VII  | 1.528                             | 1.853  | -0.038 | -1.853 | -0.38        | 0.13         | -0.38        |
| FeN <sub>4</sub> -VIII | -0.513                            | 0.131  | 1.854  | -1.855 | 0.03         | -0.52        | -0.52        |
| FeN <sub>4</sub> -IX   | 1.847                             | 1.860  | 1.903  | 1.846  | 0.25         | 0.28         | 0.00         |
| <b>*H</b>              |                                   |        |        |        |              |              |              |
| FeN <sub>4</sub> -I    | -0.001                            | 0.140  | 0.140  | -0.140 | -0.01        | -0.01        | -0.01        |
| FeN <sub>4</sub> -II   | 0.000                             | 0.883  | 0.883  | 0.883  | -0.14        | -0.14        | -0.14        |
| FeN <sub>4</sub> -III  | -0.014                            | 1.020  | 1.020  | 1.020  | -0.21        | -0.21        | -0.21        |
| FeN <sub>4</sub> -IV   | 0.000                             | 0.781  | 0.781  | 0.781  | -0.07        | -0.07        | -0.07        |
| FeN <sub>4</sub> -V    | 0.002                             | 0.942  | 0.942  | 0.941  | -0.17        | -0.17        | -0.17        |
| FeN <sub>4</sub> -VI   | 0.972                             | 1.051  | 0.499  | 0.720  | 0.17         | 2.31         | 1.63         |
| FeN <sub>4</sub> -VII  | 0.015                             | 0.913  | -0.951 | 0.002  | -0.13        | -0.13        | 0.00         |
| FeN <sub>4</sub> -VIII | -0.954                            | -0.952 | 0.954  | 1.028  | 0.00         | 0.00         | 0.08         |
| FeN <sub>4</sub> -IX   | 0.940                             | 0.001  | 0.048  | -0.941 | 0.19         | 0.19         | 0.00         |
| <b>*OH</b>             |                                   |        |        |        |              |              |              |
| FeN <sub>4</sub> -I    | 0.027                             | 2.262  | 2.262  | 2.263  | -0.49        | -0.49        | -0.49        |
| FeN <sub>4</sub> -II   | 0.008                             | 0.993  | 0.993  | 0.993  | -0.27        | -0.27        | -0.27        |
| FeN <sub>4</sub> -III  | -0.098                            | 1.066  | 1.066  | 1.066  | -0.31        | -0.31        | -0.31        |

|                        |        |       |       |       |       |       |       |
|------------------------|--------|-------|-------|-------|-------|-------|-------|
| FeN <sub>4</sub> -IV   | -0.013 | 1.038 | 1.038 | 1.038 | -0.30 | -0.30 | -0.30 |
| FeN <sub>4</sub> -V    | -1.014 | 1.015 | 1.015 | 1.015 | 0.00  | 0.00  | 0.00  |
| FeN <sub>4</sub> -VI   | -1.080 | 1.566 | 2.483 | 2.472 | 0.95  | 2.33  | 2.07  |
| FeN <sub>4</sub> -VII  | -1.036 | 1.036 | 1.037 | 1.037 | 0.00  | 0.00  | 0.00  |
| FeN <sub>4</sub> -VIII | 1.078  | 1.077 | 1.567 | 1.436 | 0.00  | 0.95  | 0.21  |
| FeN <sub>4</sub> -IX   | 0.133  | 1.040 | 1.433 | 1.620 | -0.33 | -0.11 | 0.51  |

**\*O**

|                        |        |        |        |        |       |       |       |
|------------------------|--------|--------|--------|--------|-------|-------|-------|
| FeN <sub>4</sub> -I    | 0.141  | 1.315  | 1.317  | 1.317  | -0.34 | -0.34 | -0.34 |
| FeN <sub>4</sub> -II   | 1.213  | 1.213  | 1.213  | 1.213  | 0.00  | 0.00  | 0.00  |
| FeN <sub>4</sub> -III  | -1.214 | 1.214  | 1.214  | 1.214  | 0.00  | 0.00  | 0.00  |
| FeN <sub>4</sub> -IV   | -0.135 | 1.224  | -0.074 | 1.224  | -0.34 | -0.01 | -0.34 |
| FeN <sub>4</sub> -V    | 1.224  | 1.224  | 2.062  | 1.224  | 0.00  | 0.80  | 0.00  |
| FeN <sub>4</sub> -VI   | -0.323 | 1.337  | 3.598  | 3.561  | 0.17  | 5.38  | 5.94  |
| FeN <sub>4</sub> -VII  | 0.541  | -0.026 | 1.225  | 1.225  | -0.11 | -0.43 | -0.43 |
| FeN <sub>4</sub> -VIII | 1.221  | 1.221  | 1.221  | 1.467  | 0.00  | 0.00  | 0.17  |
| FeN <sub>4</sub> -IX   | -0.128 | 1.226  | -0.127 | -0.127 | -0.34 | 0.00  | 0.00  |

**\*OOH**

|                        |        |       |       |       |       |       |       |
|------------------------|--------|-------|-------|-------|-------|-------|-------|
| FeN <sub>4</sub> -I    | -0.172 | 0.988 | 0.989 | 0.988 | -0.29 | -0.29 | -0.29 |
| FeN <sub>4</sub> -II   | 0.003  | 0.942 | 0.942 | 0.942 | -0.28 | -0.28 | -0.28 |
| FeN <sub>4</sub> -III  | 0.006  | 0.805 | 0.805 | 0.805 | -0.23 | -0.23 | -0.23 |
| FeN <sub>4</sub> -IV   | 0.959  | 0.960 | 0.960 | 0.960 | 0.00  | 0.00  | 0.00  |
| FeN <sub>4</sub> -V    | 0.017  | 0.947 | 0.947 | 0.947 | -0.30 | -0.30 | -0.30 |
| FeN <sub>4</sub> -VI   | -0.957 | 1.849 | 2.878 | 2.470 | 0.62  | 3.78  | 3.20  |
| FeN <sub>4</sub> -VII  | -0.959 | 0.959 | 0.959 | 0.959 | 0.00  | 0.00  | 0.00  |
| FeN <sub>4</sub> -VIII | 0.965  | 0.965 | 1.437 | 1.515 | 0.00  | 0.63  | 0.99  |
| FeN <sub>4</sub> -IX   | 0.031  | 0.963 | 1.236 | 1.344 | -0.32 | -0.17 | -0.08 |

**Table S5.** Comparison of magnetic moments and energies for 3d metal-based MN<sub>4</sub>-X single-atom catalysts under antiferromagnetic and ferromagnetic configurations.

| Structure              | Magnetic moment ( $\mu\text{B}$ ) |         |        |        | Energy (eV)             |
|------------------------|-----------------------------------|---------|--------|--------|-------------------------|
|                        | AFM(M1)                           | AFM(M2) | FM(M1) | FM(M2) | $\Delta(\text{FM-AFM})$ |
| CoN <sub>4</sub> -I    | -0.498                            | 0.498   | 0.507  | 0.507  | 0.020                   |
| CoN <sub>4</sub> -II   | -0.705                            | 0.705   | 0.693  | 0.693  | -0.028                  |
| CoN <sub>4</sub> -III  | -0.772                            | 0.772   | 0.817  | 0.817  | 0.006                   |
| CoN <sub>4</sub> -IV   | -0.631                            | 0.616   | 0.657  | 0.658  | -0.010                  |
| CoN <sub>4</sub> -V    | -0.750                            | 0.750   | 0.750  | 0.750  | 0.000                   |
| CoN <sub>4</sub> -VI   | -0.769                            | 0.765   | 0.772  | 0.772  | -0.160                  |
| CoN <sub>4</sub> -VII  | -0.848                            | 0.848   | 0.849  | 0.849  | 0.002                   |
| CoN <sub>4</sub> -VIII | -0.795                            | 0.793   | 0.793  | 0.793  | -0.001                  |
| CoN <sub>4</sub> -IX   | -0.769                            | 0.769   | 0.574  | 0.574  | 0.070                   |
| CrN <sub>4</sub> -I    | -3.143                            | 3.143   | 3.136  | 3.136  | -0.090                  |
| CrN <sub>4</sub> -II   | -3.155                            | 3.155   | 3.182  | 3.182  | 0.023                   |
| CrN <sub>4</sub> -III  | -3.215                            | 3.215   | 3.230  | 3.230  | 0.040                   |
| CrN <sub>4</sub> -IV   | -3.223                            | 3.223   | 3.217  | 3.217  | -0.004                  |
| CrN <sub>4</sub> -V    | -3.224                            | 3.224   | 3.230  | 3.230  | 0.010                   |
| CrN <sub>4</sub> -VI   | -3.218                            | 3.218   | 3.223  | 3.223  | 0.013                   |
| CrN <sub>4</sub> -VII  | -3.235                            | 3.235   | 3.238  | 3.238  | 0.006                   |
| CrN <sub>4</sub> -VIII | -3.222                            | 3.222   | 3.219  | 3.219  | -0.008                  |
| CrN <sub>4</sub> -IX   | -3.232                            | 3.232   | 3.233  | 3.233  | 0.003                   |
| CuN <sub>4</sub> -I    | 0.000                             | 0.000   | 0.193  | 0.193  | -0.057                  |
| CuN <sub>4</sub> -II   | -0.497                            | 0.497   | 0.521  | 0.521  | 0.020                   |
| CuN <sub>4</sub> -III  | -0.429                            | 0.429   | 0.461  | 0.461  | -0.038                  |
| CuN <sub>4</sub> -IV   | -0.523                            | 0.523   | 0.525  | 0.525  | 0.007                   |
| CuN <sub>4</sub> -V    | -0.526                            | 0.526   | 0.526  | 0.526  | 0.010                   |
| CuN <sub>4</sub> -VI   | -0.529                            | 0.529   | 0.529  | 0.529  | 0.001                   |
| CuN <sub>4</sub> -VII  | -0.530                            | 0.530   | 0.531  | 0.531  | 0.001                   |
| CuN <sub>4</sub> -VIII | -0.532                            | 0.532   | 0.533  | 0.533  | 0.000                   |

|                        |        |       |       |       |        |
|------------------------|--------|-------|-------|-------|--------|
| CuN <sub>4</sub> -IX   | -0.534 | 0.534 | 0.533 | 0.533 | 0.000  |
| FeN <sub>4</sub> -I    | -1.536 | 1.536 | 1.571 | 1.571 | 0.016  |
| FeN <sub>4</sub> -II   | -1.820 | 1.820 | 1.804 | 1.804 | 0.001  |
| FeN <sub>4</sub> -III  | -1.866 | 1.866 | 1.880 | 1.880 | -0.040 |
| FeN <sub>4</sub> -IV   | -1.705 | 1.705 | 1.843 | 1.843 | -0.429 |
| FeN <sub>4</sub> -V    | -1.848 | 1.848 | 1.848 | 1.848 | 0.001  |
| FeN <sub>4</sub> -VI   | -1.859 | 1.859 | 1.860 | 1.859 | 0.010  |
| FeN <sub>4</sub> -VII  | -1.854 | 1.854 | 1.854 | 1.854 | 0.000  |
| FeN <sub>4</sub> -VIII | -1.865 | 1.865 | 1.842 | 1.865 | -0.010 |
| FeN <sub>4</sub> -IX   | -1.848 | 1.848 | 1.849 | 1.848 | 0.016  |
| MnN <sub>4</sub> -I    | -2.773 | 2.773 | 2.576 | 2.576 | -0.027 |
| MnN <sub>4</sub> -II   | -2.906 | 2.906 | 2.905 | 2.905 | 0.014  |
| MnN <sub>4</sub> -III  | -2.966 | 2.965 | 2.963 | 2.963 | -0.085 |
| MnN <sub>4</sub> -IV   | -2.926 | 2.926 | 2.935 | 2.935 | 0.005  |
| MnN <sub>4</sub> -V    | -2.923 | 2.923 | 2.918 | 2.918 | -0.008 |
| MnN <sub>4</sub> -VI   | -2.967 | 2.967 | 2.945 | 2.945 | -0.018 |
| MnN <sub>4</sub> -VII  | -2.920 | 2.920 | 2.919 | 2.919 | -0.001 |
| MnN <sub>4</sub> -VIII | -2.942 | 2.942 | 2.934 | 2.934 | -0.014 |
| MnN <sub>4</sub> -IX   | -2.924 | 2.924 | 2.919 | 2.919 | 0.002  |

## References

1. B. Hinnemann, J. K. Nørskov and H. Topsøe, *Phys. Chem. B*, 2005, **109**, 2245-2253.
2. Y. Wang, W. Qiu, E. Song, F. Gu, Z. Zheng, X. Zhao, Y. Zhao, J. Liu and W. Zhang, *Natl. Sci. Rev.*, 2017, **5**, 327-341.
3. S. Steinberg and R. Dronskowski, *Journal*, 2018, **8**.
